# Supplementary material for: [3 + 2] vs. [4 + 1] Annulation: revisiting mechanism studies on the phosphine-catalysed domino sequence of alkynoates and activated methylenes
Source: Royal Society of Chemistry journal article supplement (doi:10.1039/d2ob00603k), 2022-01-01
Supplement: d2ob00603k1.pdf [file d2ob00603k1.pdf]

## Supplementary data

### **[3+2] vs [4+1] Annulation: Revisiting mechanism studies on phosphine-catalyzed domino sequence of alkynoates and activated methylenes**

Yan-Shan Chen<sup>a</sup>, Yu Zheng<sup>a</sup>, Kai Tang<sup>a</sup>, Zhenzhen Xie<sup>a</sup>, Zhi-Peng Ye<sup>a</sup>, Ming-Zhi Li<sup>a</sup>, Kai Chen<sup>a\*</sup>, Hao-Yue Xiang<sup>a</sup>, Hua Yang<sup>a\*</sup>

<sup>a</sup>College of Chemistry and Chemical Engineering, Central South University, Changsha 410083, P. R. China

E-mail: [kaichen@csu.edu.cn](mailto:kaichen@csu.edu.cn), [hyangchem@csu.edu.cn](mailto:hyangchem@csu.edu.cn)

## Contents

|                                                                         |               |
|-------------------------------------------------------------------------|---------------|
| <b>1. Stability of diketone structures .....</b>                        | <b>S2</b>     |
| <b>2. Studies on [1,3]-proton shift of intermediate X .....</b>         | <b>S2</b>     |
| <b>3. Studies on phosphine-catalyzed Knoevenagel condensation .....</b> | <b>S4</b>     |
| <b>4. Isomerization of vinyl anion VI .....</b>                         | <b>S5</b>     |
| <b>5. Substrate-mediated [1,5]-H shift.....</b>                         | <b>S6</b>     |
| <b>6. Studies on the transformation from intermediate IX to X.....</b>  | <b>S7</b>     |
| <b>7. Tables of energies and other thermodynamic parameters.....</b>    | <b>S8</b>     |
| <b>8. Coordinates of all stationary points. ....</b>                    | <b>S10-41</b> |

## 1. Stability of diketone structures

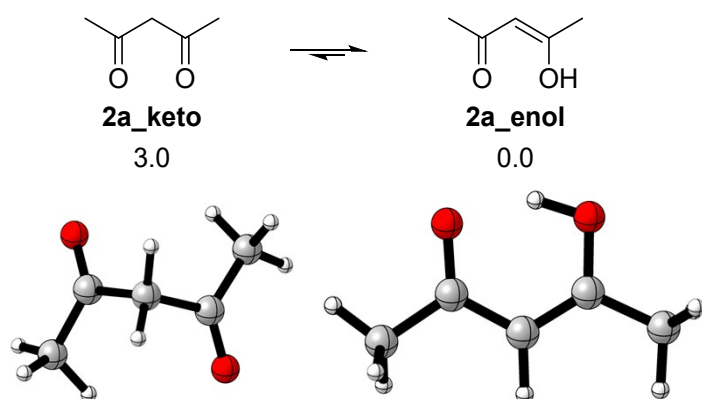

Obviously, the enol configuration **2a\_enol** is more stable than the diketone configuration by 3.0 kcal/mol, which is also consistent with previous theoretical results.

## 2. Studies on [1,3]-proton shift of intermediate X

Several stepwise [1,3]-proton shift pathway was considered, and the **2a**-mediated pathway is most favorable with a free energy barrier about 15.6 kcal/mol.

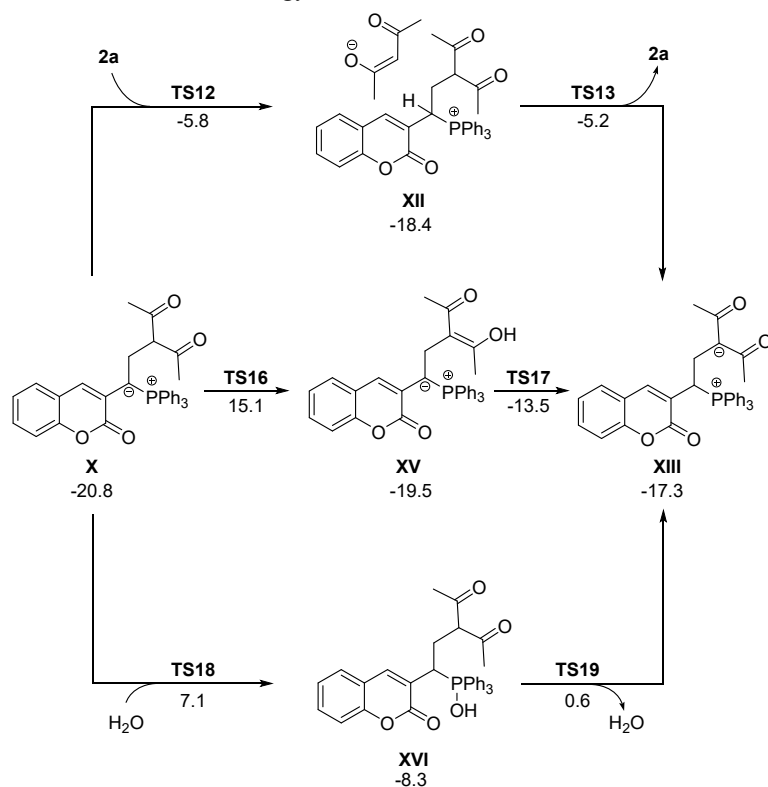

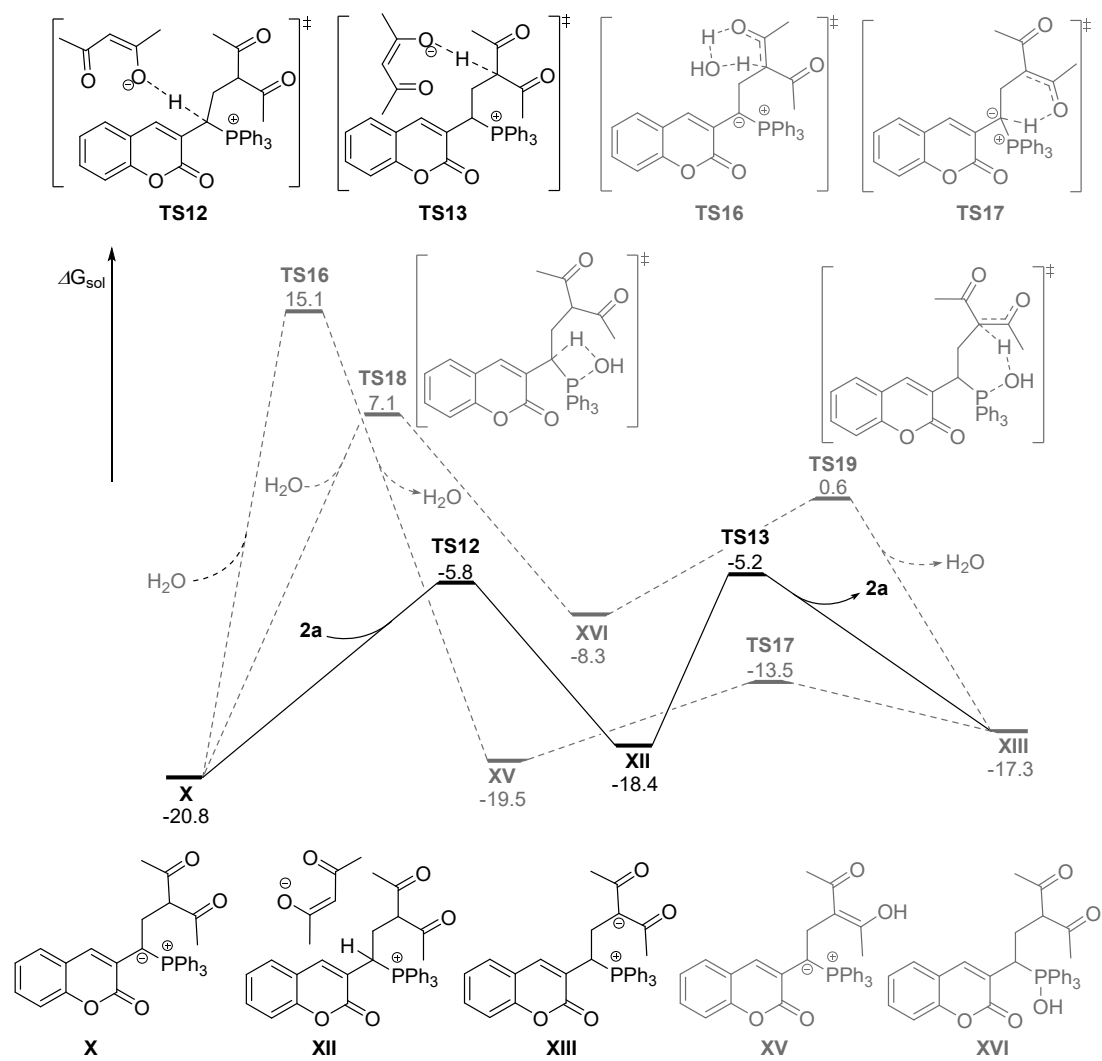

**Figure S1.** Free energy profiles of [1,3]-proton shift of intermediate X.

### 3. Studies on phosphine-catalyzed Knoevenagel condensation

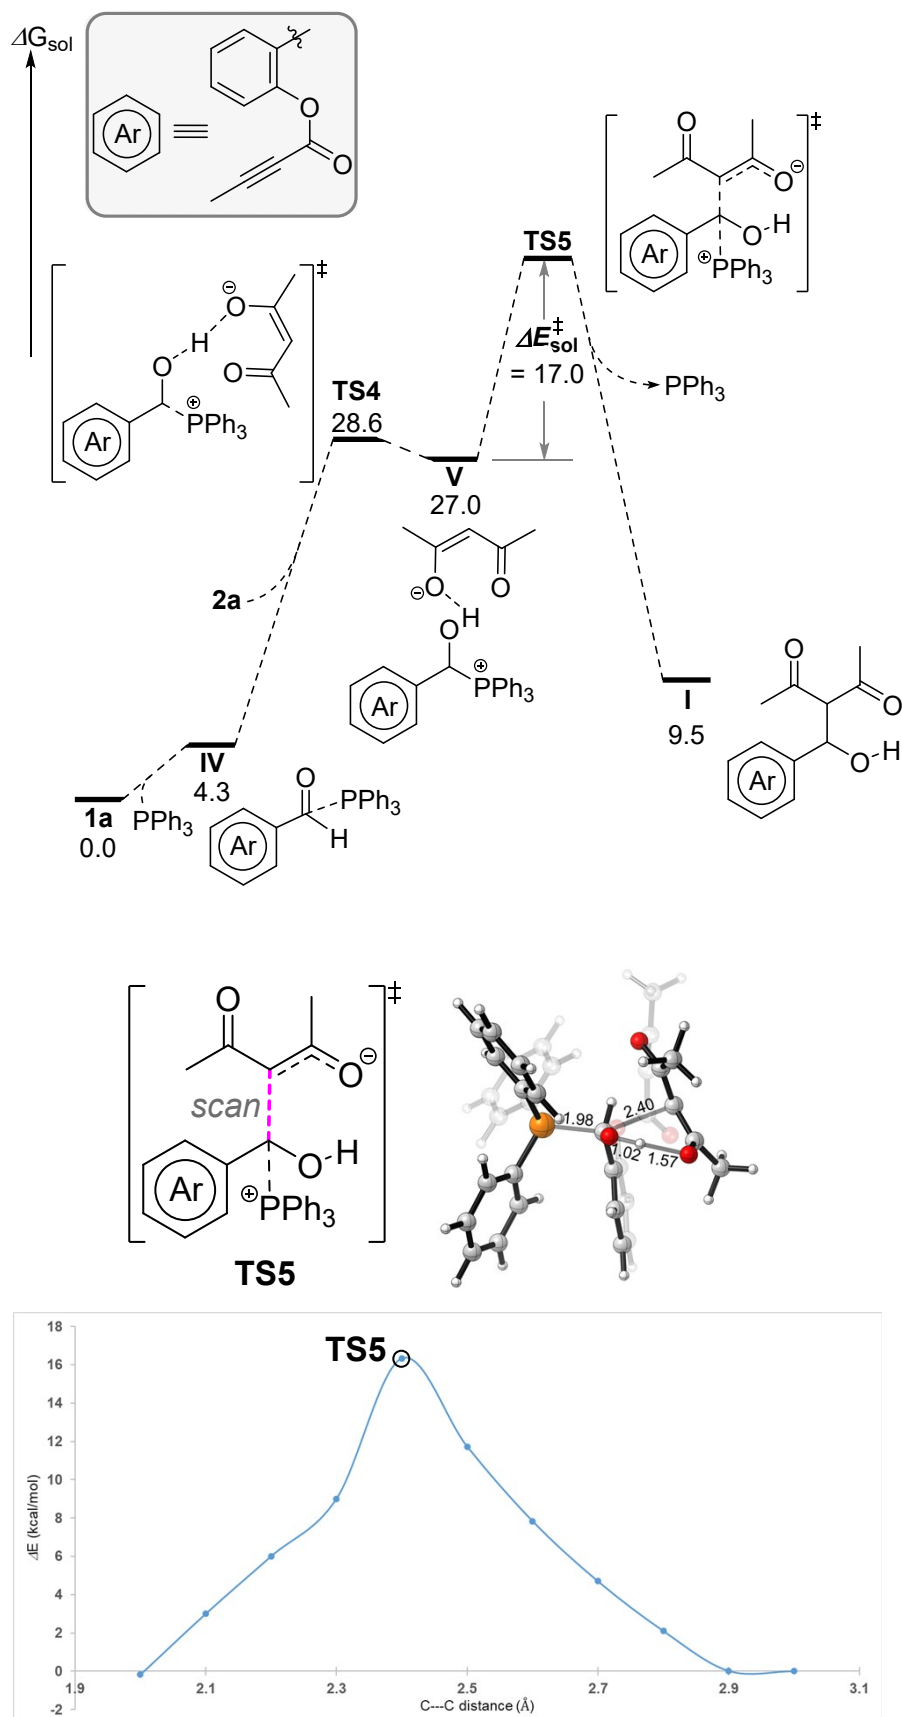

**Figure S2.** Energy profile during the scanning of forming C-C bond via **TS5**.

#### 4. Isomerization of vinyl anion VI.

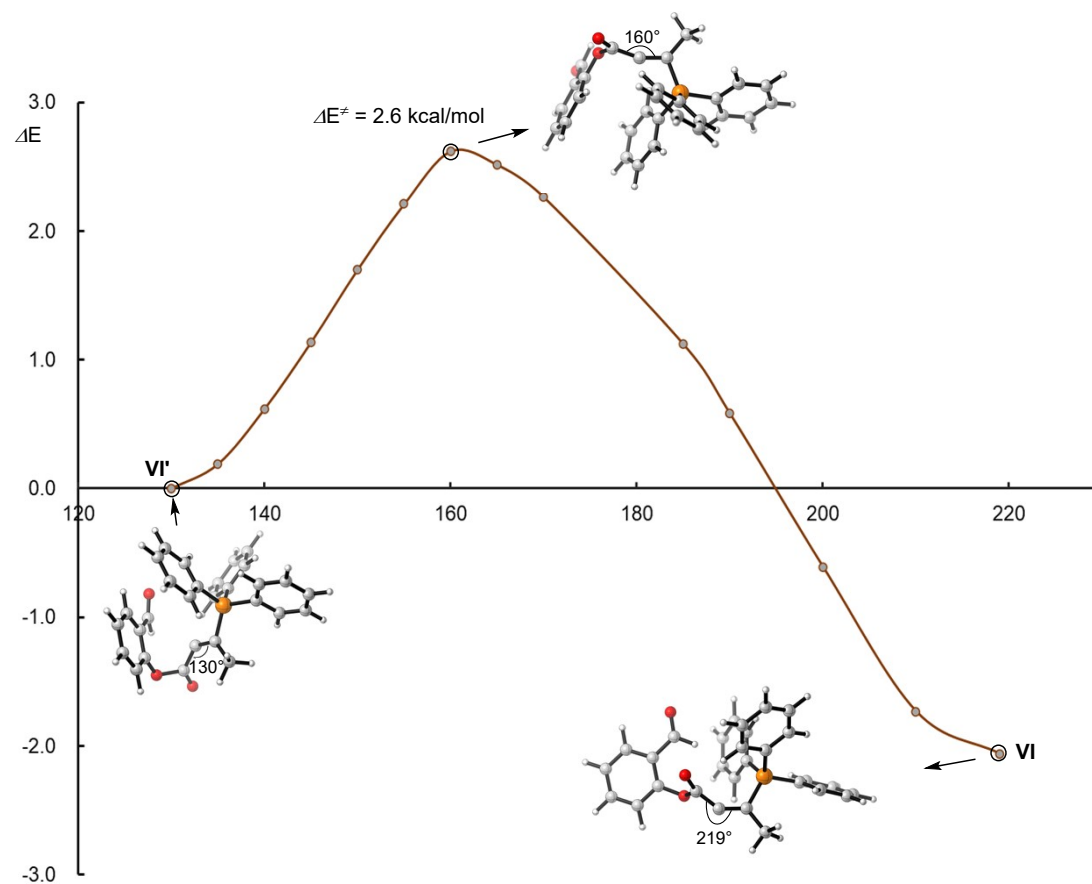

**Figure S3.** Energy profile for isomerization of adduct intermediate VI.

After extensive efforts, the transition state responding to the isomerization of VI to VI' could not be located. The energy barrier was estimated by scanning the reaction coordinates (angle  $\text{C}(\text{Me})-\text{C}-\text{C}(\text{O}_2)$ , to be about 2.6 kcal/mol.

### 5. Substrate-mediated [1,5]-H shift.

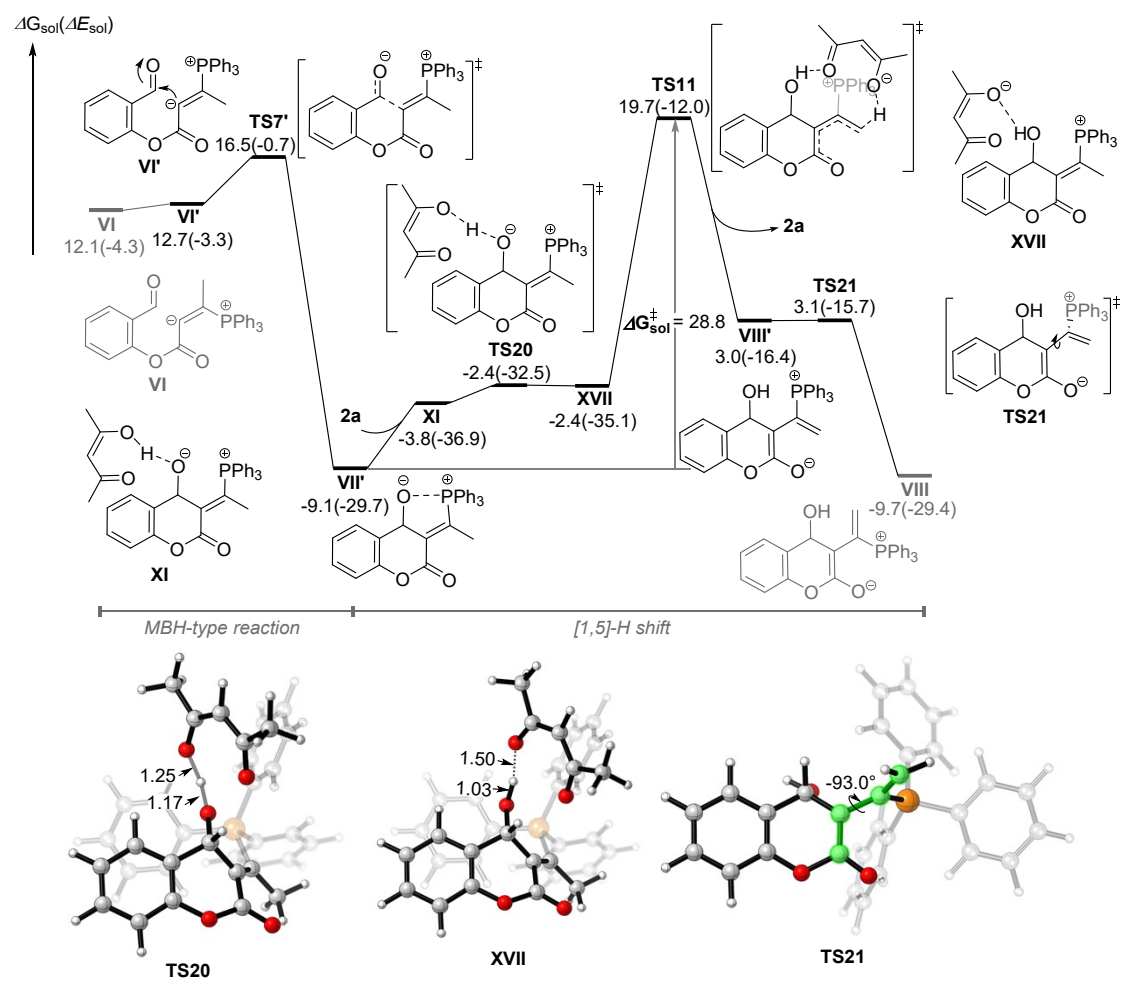

**Figure S4.** Free energy profile of the alternative [4+1] annulation pathway.

## 6. Studies on the transformation from intermediate IX to X

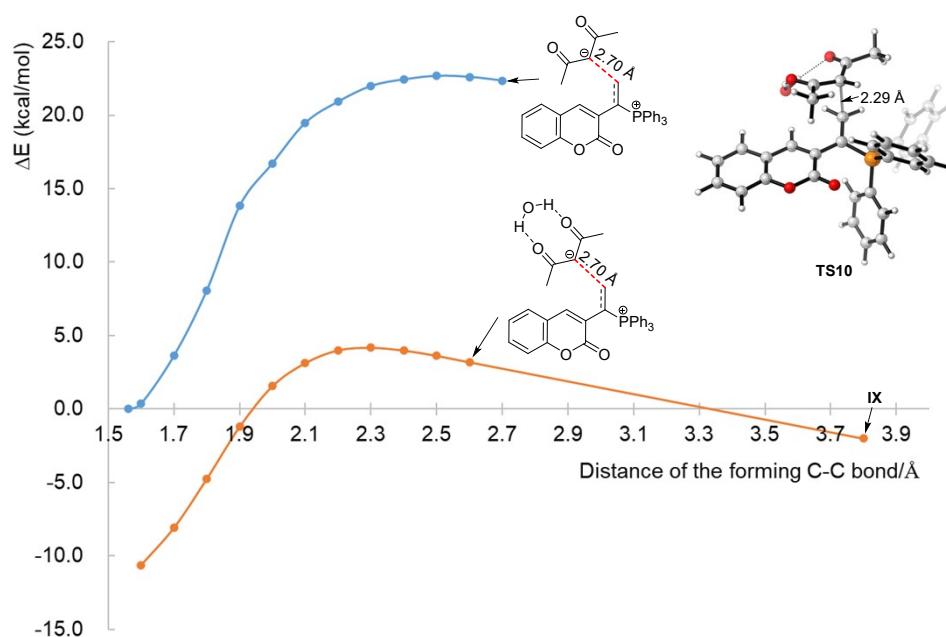

**Fig. S5.** Energy profile when scanning the forming C-C bond from **IX** to **X**

The conversion of **IX** to **X** was driven by the favorable electrostatic interaction between dicarbonyl anion and vinyl phosphonium. It is nearly a barrier-less process when the coordinated water is released (blue line in Fig. S5), while there is a low barrier when approaching the dicarbonyl anion—water complex to the vinyl phosphonium (orange line in Fig. S5). After extensive efforts, the corresponding transition state **TS10** was successfully optimized, with a free energy barrier about 6.1 kcal/mol. And the forming C—C bond is 2.29 Å in length.

## 7. Tables of energies and other thermodynamic parameters.

**Table S1**

|                        | $E_{\text{ele}}$ | $E_{\text{ele}}(\text{SP})$ | ZPE      | H           | G(T)        | $q_{\text{h}}G(\text{T})$ |
|------------------------|------------------|-----------------------------|----------|-------------|-------------|---------------------------|
| <b>2a_enol</b>         | -345.83634       | -345.93782                  | 0.12325  | -345.70422  | -345.74418  | -345.74269                |
| <b>2a_keto</b>         | -345.83226       | -345.93229                  | 0.12243  | -345.70057  | -345.74037  | -345.73931                |
| <b>1a</b>              | -649.65560       | -649.82307                  | 0.16123  | -649.48096  | -649.53241  | -649.53013                |
| <b>PPh<sub>3</sub></b> | -1036.41021      | -1036.59399                 | 0.27426  | -1036.11915 | -1036.17905 | -1036.17515               |
| <b>3a</b>              | -919.12020       | -919.35560                  | 0.26579  | -918.83616  | -918.89634  | -918.89428                |
| <b>H<sub>2</sub>O</b>  | -76.42315        | -76.46360                   | 0.02109  | -76.39828   | -76.41735   | -76.41735                 |
| <b>TS1</b>             | -995.46323       | -995.73211                  | 0.28203  | -995.15832  | -995.23354  | -995.22751                |
| <b>I</b>               | -995.50205       | -995.76892                  | 0.28862  | -995.19051  | -995.26625  | -995.25968                |
| <b>TS2</b>             | -1071.89893      | -1072.20157                 | 0.31145  | -1071.56395 | -1071.63797 | -1071.63335               |
| <b>II</b>              | -995.49608       | -995.76364                  | 0.29054  | -995.18372  | -995.25341  | -995.24939                |
| <b>TS3</b>             | -995.46294       | -995.73028                  | 0.28639  | -995.15492  | -995.22333  | -995.22013                |
| <b>III</b>             | -919.05595       | -919.29383                  | 0.25997  | -918.77425  | -918.84708  | -918.84116                |
| <b>IV</b>              | -1686.08151      | -1686.43057                 | 0.43669  | -1685.61263 | -1685.71181 | -1685.70065               |
| <b>TS4</b>             | -2031.90184      | -2032.34959                 | 0.55802  | -2031.30344 | -2031.41971 | -2031.40736               |
| <b>V</b>               | -2031.90886      | -2032.35755                 | 0.56344  | -2031.30505 | -2031.42094 | -2031.40894               |
| <b>TS6</b>             | -1686.06443      | -1686.41551                 | 0.43718  | -1685.59683 | -1685.68749 | -1685.68005               |
| <b>VI</b>              | -1686.07392      | -1686.42395                 | 0.43905  | -1685.60468 | -1685.69377 | -1685.68720               |
| <b>TS7</b>             | -1686.05515      | -1686.40543                 | 0.43833  | -1685.58764 | -1685.67483 | -1685.66823               |
| <b>VII</b>             | -1686.08438      | -1686.43183                 | 0.44178  | -1685.61379 | -1685.69903 | -1685.69328               |
| <b>TS8</b>             | -1686.06155      | -1686.41248                 | 0.43623  | -1685.59730 | -1685.68129 | -1685.67524               |
| <b>VIII</b>            | -1686.11365      | -1686.46385                 | 0.44219  | -1685.64279 | -1685.72787 | -1685.72188               |
| <b>TS9</b>             | -2031.95570      | -2032.40462                 | 0.56523  | -2031.35321 | -2031.45698 | -2031.44903               |
| <b>IX</b>              | -2031.97021      | -2032.42363                 | 0.56521  | -2031.36563 | -2031.47540 | -2031.46597               |
| <b>TS10</b>            | -2031.96035      | -2032.41379                 | 0.56490  | -2031.35669 | -2031.46589 | -2031.45619               |
| <b>X</b>               | -1955.54385      | -1955.95982                 | 0.54170  | -1954.96621 | -1955.06900 | -1955.06011               |
| <b>TS12</b>            | -2301.38239      | -2301.89163                 | 0.66190  | -2300.67537 | -2300.79862 | -2300.78714               |
| <b>XII</b>             | -2301.40663      | -2301.91713                 | 0.66758  | -2300.69375 | -2300.81643 | -2300.80582               |
| <b>TS13</b>            | -2301.38029      | -2301.89293                 | 0.66284  | -2300.67303 | -2300.79219 | -2300.78276               |
| <b>XIII</b>            | -1955.53653      | -1955.95548                 | 0.54255  | -1954.95847 | -1955.06009 | -1955.05153               |
| <b>TS14</b>            | -1955.52559      | -1955.94586                 | 0.54236  | -1954.94869 | -1955.04714 | -1955.03956               |
| <b>XIV</b>             | -1955.53259      | -1955.95356                 | 0.54332  | -1954.95434 | -1955.05325 | -1955.04570               |
| <b>TS15</b>            | -1955.52852      | -1955.94613                 | 0.54236  | -1954.95144 | -1955.05027 | -1955.04251               |
| <b>TS16</b>            | -2031.930729     | -2032.380541                | 0.562057 | -2031.3317  | -2031.4347  | -2031.42695               |
| <b>XV</b>              | -1955.543778     | -1955.960929                | 0.543421 | -1954.96548 | -1955.0643  | -1955.05679               |
| <b>TS17</b>            | -1955.529303     | -1955.945777                | 0.538031 | -1954.95624 | -1955.05654 | -1955.04805               |
| <b>TS18</b>            | -2031.948252     | -2032.396627                | 0.565005 | -2031.34652 | -2031.4485  | -2031.44105               |
| <b>XVI</b>             | -2031.978745     | -2032.424127                | 0.569054 | -2031.37219 | -2031.47757 | -2031.46865               |
| <b>TS19</b>            | -2031.956292     | -2032.405616                | 0.563975 | -2031.35531 | -2031.45826 | -2031.45046               |
| <b>VI'</b>             | -1686.07064      | -1686.42224                 | 0.43846  | -1685.60182 | -1685.69207 | -1685.68476               |
| <b>TS7'</b>            | -1686.06803      | -1686.41818                 | 0.43890  | -1685.60003 | -1685.68615 | -1685.68008               |
| <b>VII'</b>            | -1686.12207      | -1686.46439                 | 0.44293  | -1685.65095 | -1685.73427 | -1685.72875               |



|              |             |             |         |             |             |             |
|--------------|-------------|-------------|---------|-------------|-------------|-------------|
| <b>XI</b>    | -2031.97421 | -2032.41366 | 0.56700 | -2031.36892 | -2031.47711 | -2031.46726 |
| <b>TS20</b>  | -2031.96309 | -2032.40666 | 0.56212 | -2031.36299 | -2031.47050 | -2031.46089 |
| <b>XVII</b>  | -2031.96515 | -2032.41073 | 0.56655 | -2031.36036 | -2031.46836 | -2031.45889 |
| <b>TS11</b>  | -2031.92793 | -2032.37401 | 0.56257 | -2031.32834 | -2031.43072 | -2031.42328 |
| <b>VIII'</b> | -1686.08806 | -1686.44319 | 0.44145 | -1685.61794 | -1685.70219 | -1685.69668 |
| <b>TS21</b>  | -1686.08892 | -1686.44211 | 0.44072 | -1685.61990 | -1685.70417 | -1685.69845 |

---

Notes:  $E_{\text{elec}}$ , ZPE, H, G(T), and  ${}_{\text{qh}}G(T)$  were the electronic energies, zero-point energies, sum of electronic and thermal enthalpies, sum of electronic and thermal free energies, and sum of electronic and thermal free energies using Grimme's quasiharmonic approximation, respectively, which were given at the B3LYP-D3(BJ)/6-31+G(d) level.  $E_{\text{elec}}(\text{SP})$  were electronic energies with solvent correction at the SMD(1,4-dioxane)-B3LYP-D3(BJ)/6-311++G(d,p) level.

## 8. Coordinates of all stationary points.

|                |           |           |           |           |           |           |           |
|----------------|-----------|-----------|-----------|-----------|-----------|-----------|-----------|
| <b>1a</b>      |           |           |           | H         | 1.974630  | -0.333984 | -0.586247 |
| C              | -1.254579 | -1.642064 | -0.455518 | H         | 1.812152  | 0.603229  | -2.113923 |
| C              | -0.803312 | -0.337582 | -0.275290 | H         | 1.159924  | -1.056113 | -1.972156 |
| C              | -1.691303 | 0.717909  | -0.023375 | C         | 0.005904  | 0.438973  | -0.960764 |
| C              | -3.065907 | 0.434834  | 0.044758  | C         | -0.688534 | -0.351891 | 0.155829  |
| C              | -3.531342 | -0.863354 | -0.127695 | H         | -0.435887 | -1.413711 | 0.095867  |
| C              | -2.622657 | -1.900270 | -0.376993 | H         | -1.767224 | -0.201937 | 0.061919  |
| H              | -0.544521 | -2.438609 | -0.645647 | C         | -0.176440 | 0.189363  | 1.497233  |
| H              | -3.744738 | 1.259766  | 0.237217  | C         | -0.940780 | 1.352334  | 2.082347  |
| H              | -4.595076 | -1.073983 | -0.070480 | H         | -1.938180 | 1.015137  | 2.394108  |
| H              | -2.980641 | -2.916846 | -0.512819 | H         | -0.408780 | 1.762452  | 2.943140  |
| O              | -1.952494 | 3.050927  | 0.388104  | H         | -1.091286 | 2.124324  | 1.317776  |
| O              | 0.550242  | -0.026929 | -0.422489 | O         | -0.483281 | 1.469794  | -1.385937 |
| C              | 1.463588  | -0.628031 | 0.409708  | O         | 0.817743  | -0.283941 | 2.017095  |
| C              | 2.792307  | -0.185620 | 0.088647  |           |           |           |           |
| C              | 3.934097  | 0.156626  | -0.127778 | <b>3a</b> |           |           |           |
| O              | 1.174689  | -1.408258 | 1.287427  | C         | -3.364228 | -1.000235 | 0.004590  |
| C              | 5.306829  | 0.566653  | -0.389822 | C         | -2.284030 | -0.140470 | -0.183953 |
| H              | 5.339727  | 1.444237  | -1.045139 | C         | -0.982930 | -0.621374 | -0.365972 |
| H              | 5.822864  | 0.812606  | 0.545540  | C         | -0.790116 | -2.006870 | -0.368522 |
| H              | 5.861985  | -0.244447 | -0.875989 | C         | -1.859593 | -2.881469 | -0.178364 |
| C              | -1.211410 | 2.106239  | 0.171140  | C         | -3.149468 | -2.377017 | 0.009116  |
| H              | -0.118809 | 2.254209  | 0.109814  | H         | -4.352389 | -0.575041 | 0.146951  |
|                |           |           |           | H         | 0.210514  | -2.403669 | -0.503175 |
| <b>2a_enol</b> |           |           |           | H         | -1.683961 | -3.953200 | -0.174175 |
| C              | -0.368443 | 0.108939  | -2.620557 | H         | -3.987517 | -3.051500 | 0.159094  |
| H              | 0.516027  | -0.474146 | -2.903546 | C         | 0.108377  | 0.387521  | -0.630262 |
| H              | -0.468643 | 0.973076  | -3.280491 | H         | 0.232677  | 0.442968  | -1.725144 |
| H              | -1.241968 | -0.543794 | -2.745568 | C         | -0.273601 | 1.767359  | -0.146901 |
| C              | -0.270788 | 0.568958  | -1.183398 | C         | -1.676927 | 2.212477  | -0.116290 |
| C              | 0.002068  | -0.413289 | -0.159915 | O         | -2.611456 | 1.216603  | -0.204879 |
| H              | 0.140615  | -1.452343 | -0.435955 | O         | -2.047399 | 3.359975  | -0.016575 |
| C              | 0.087711  | -0.052818 | 1.162232  | C         | 1.540436  | 0.192773  | -0.010375 |
| C              | 0.364168  | -1.009313 | 2.278236  | C         | 0.781722  | 2.478122  | 0.259673  |
| H              | 0.489447  | -2.029514 | 1.908327  | H         | 0.739904  | 3.500430  | 0.619581  |
| H              | 1.272039  | -0.704955 | 2.812302  | C         | 2.050737  | 1.672419  | 0.171493  |
| H              | -0.460507 | -0.985964 | 3.000393  | H         | 2.679329  | 1.781132  | 1.063827  |
| O              | -0.435088 | 1.778612  | -0.905380 | H         | 2.665296  | 2.002900  | -0.675568 |
| O              | -0.070984 | 1.205054  | 1.563967  | C         | 1.487604  | -0.379298 | 1.425708  |
| H              | -0.249824 | 1.747500  | 0.733844  | C         | 2.387142  | -0.673979 | -0.948623 |
|                |           |           |           | C         | 3.013695  | -0.036818 | -2.172739 |
| <b>2a_keto</b> |           |           |           | H         | 3.959305  | 0.443666  | -1.888716 |
| C              | 1.327540  | -0.108791 | -1.442830 | H         | 3.231263  | -0.815299 | -2.906848 |

|                        |           |           |           |          |           |           |           |
|------------------------|-----------|-----------|-----------|----------|-----------|-----------|-----------|
| H                      | 2.378785  | 0.734741  | -2.619845 | C        | -0.133054 | 4.082427  | -1.924480 |
| C                      | 2.778424  | -0.898804 | 2.027231  | H        | -1.540968 | 4.471869  | -0.334077 |
| H                      | 2.762168  | -0.731405 | 3.106880  | H        | 1.298602  | 3.393688  | -3.384428 |
| H                      | 2.839562  | -1.975128 | 1.834669  | H        | -0.186249 | 5.089183  | -2.330312 |
| H                      | 3.669037  | -0.440686 | 1.585113  |          |           |           |           |
| O                      | 0.464113  | -0.329064 | 2.077589  | <b>I</b> |           |           |           |
| O                      | 2.519019  | -1.868124 | -0.736419 | C        | -1.973697 | -1.343342 | 3.863429  |
|                        |           |           |           | C        | -1.672935 | -1.581923 | 2.525217  |
| <b>H<sub>2</sub>O</b>  |           |           |           | C        | -1.078462 | -0.610584 | 1.708681  |
| O                      | -0.796527 | 1.717580  | 0.000000  | C        | -0.775410 | 0.628014  | 2.282730  |
| H                      | 0.171805  | 1.751364  | 0.000000  | C        | -1.080215 | 0.892190  | 3.619395  |
| H                      | -1.087917 | 2.641648  | 0.000000  | C        | -1.680629 | -0.091150 | 4.406743  |
|                        |           |           |           | H        | -2.433165 | -2.117517 | 4.463801  |
| <b>PPh<sub>3</sub></b> |           |           |           | H        | -0.277746 | 1.371701  | 1.671288  |
| P                      | 0.019981  | -0.207029 | -0.110269 | H        | -0.839605 | 1.861968  | 4.045482  |
| C                      | 1.457417  | -0.988969 | -0.969545 | H        | -1.917563 | 0.106649  | 5.448102  |
| C                      | 2.728068  | -0.788033 | -0.405601 | C        | -0.748045 | -0.912471 | 0.259450  |
| C                      | 1.350741  | -1.764315 | -2.133155 | H        | -0.210329 | -1.872045 | 0.225598  |
| C                      | 3.867851  | -1.329053 | -1.002003 | O        | -1.858091 | -2.837174 | 1.929770  |
| H                      | 2.823185  | -0.201056 | 0.505337  | C        | -3.015208 | -3.547506 | 2.099777  |
| C                      | 2.490215  | -2.317892 | -2.723470 | C        | -2.981679 | -4.731733 | 1.279350  |
| H                      | 0.376798  | -1.935772 | -2.580787 | H        | -3.937120 | -6.911916 | -0.892281 |
| C                      | 3.751035  | -2.098571 | -2.163493 | C        | -3.027253 | -5.737098 | 0.604626  |
| H                      | 4.844179  | -1.158550 | -0.555764 | C        | -3.081982 | -6.946252 | -0.206866 |
| H                      | 2.391137  | -2.918121 | -3.624433 | H        | -3.200380 | -7.831169 | 0.429446  |
| H                      | 4.636068  | -2.528637 | -2.624841 | H        | -2.168769 | -7.070186 | -0.799822 |
| C                      | -1.403332 | -1.009689 | -0.973951 | C        | -2.032060 | -1.124420 | -0.594585 |
| C                      | -2.056611 | -0.462471 | -2.087661 | H        | -2.590109 | -1.960980 | -0.171328 |
| C                      | -1.848983 | -2.241455 | -0.466952 | C        | -3.051169 | 0.039769  | -0.626124 |
| C                      | -3.124999 | -1.136729 | -2.685285 | C        | -1.695975 | -1.498603 | -2.040394 |
| H                      | -1.730564 | 0.491310  | -2.490546 | C        | -2.559035 | 1.449031  | -0.834743 |
| C                      | -2.906914 | -2.921933 | -1.071400 | H        | -1.933922 | 1.759300  | 0.006976  |
| H                      | -1.360748 | -2.669918 | 0.405652  | H        | -1.924297 | 1.506226  | -1.725966 |
| C                      | -3.550036 | -2.368935 | -2.182868 | H        | -3.417810 | 2.116165  | -0.934538 |
| H                      | -3.622521 | -0.698809 | -3.546979 | O        | -3.932781 | -3.226171 | 2.818504  |
| H                      | -3.235050 | -3.877157 | -0.669792 | O        | 0.085004  | 0.116608  | -0.244969 |
| H                      | -4.380114 | -2.892377 | -2.649841 | O        | -4.236215 | -0.225294 | -0.531173 |
| C                      | 0.009286  | 1.476010  | -0.874000 | O        | -0.682564 | -1.087076 | -2.592044 |
| C                      | -0.814325 | 2.445341  | -0.278251 | H        | 0.227624  | -0.093787 | -1.187783 |
| C                      | 0.770169  | 1.834567  | -1.996102 | C        | -2.682651 | -2.396676 | -2.740595 |
| C                      | -0.893888 | 3.735689  | -0.803910 | H        | -3.707078 | -2.046368 | -2.569419 |
| H                      | -1.398422 | 2.184628  | 0.601658  | H        | -2.461651 | -2.448992 | -3.808593 |
| C                      | 0.701366  | 3.130379  | -2.515061 | H        | -2.617992 | -3.401741 | -2.302163 |
| H                      | 1.417011  | 1.100967  | -2.467033 |          |           |           |           |

|            |           |           |           |           |           |           |           |
|------------|-----------|-----------|-----------|-----------|-----------|-----------|-----------|
| <b>II</b>  |           |           |           | C         | -1.906737 | 1.584180  | -0.530727 |
| C          | -2.597436 | 0.811483  | 2.552012  | C         | -2.390967 | 1.941001  | 0.729970  |
| C          | -2.132802 | -0.444398 | 2.169978  | H         | -2.702034 | 1.271925  | 2.773837  |
| C          | -1.550222 | -0.672128 | 0.916521  | H         | -0.963303 | 0.052881  | -1.717500 |
| C          | -1.475934 | 0.424171  | 0.045715  | H         | -1.951679 | 2.292629  | -1.352509 |
| C          | -1.939339 | 1.688047  | 0.404855  | H         | -2.820748 | 2.924709  | 0.894742  |
| C          | -2.501750 | 1.884653  | 1.668069  | C         | -0.672877 | -1.944734 | 0.159711  |
| H          | -3.022110 | 0.928924  | 3.543815  | H         | -0.053219 | -2.258596 | 0.997109  |
| H          | -1.037367 | 0.271061  | -0.937081 | O         | -1.673771 | -1.109678 | 2.640754  |
| H          | -1.857953 | 2.514387  | -0.295075 | C         | -2.531767 | -2.178969 | 2.652034  |
| H          | -2.862465 | 2.864567  | 1.966360  | C         | -2.256372 | -3.037666 | 3.771398  |
| C          | -1.067739 | -2.021533 | 0.395740  | C         | -2.068463 | -3.805121 | 4.689804  |
| H          | -0.367216 | -1.808794 | -0.420647 | C         | -1.849014 | -4.725805 | 5.796935  |
| O          | -2.175652 | -1.429166 | 3.166552  | H         | -1.876728 | -5.765110 | 5.449451  |
| C          | -2.945339 | -2.530894 | 2.983602  | C         | -0.864787 | -2.817289 | -0.849888 |
| C          | -2.765735 | -3.463176 | 4.053545  | C         | -0.254300 | -4.175850 | -0.851949 |
| C          | -2.579132 | -4.290213 | 4.917953  | C         | -1.805534 | -2.537702 | -2.006559 |
| C          | -2.331281 | -5.275980 | 5.958907  | C         | 0.745010  | -4.553664 | 0.226160  |
| H          | -1.263589 | -5.309689 | 6.205231  | H         | 1.116576  | -5.558027 | 0.014514  |
| C          | -0.389260 | -2.950039 | 1.412984  | H         | 1.585993  | -3.851878 | 0.256091  |
| H          | -2.952716 | -2.600941 | 0.329941  | H         | 0.271610  | -4.549103 | 1.215631  |
| C          | -0.528977 | -4.318020 | 1.354340  | O         | -3.393655 | -2.366561 | 1.822677  |
| C          | 0.580168  | -2.373722 | 2.365071  | O         | -0.577747 | -4.979782 | -1.719084 |
| C          | 0.137200  | -5.316464 | 2.255074  | O         | -1.418836 | -1.931264 | -2.989704 |
| H          | 0.065967  | -6.301741 | 1.786722  | C         | -3.215398 | -3.036969 | -1.833163 |
| H          | 1.177845  | -5.058472 | 2.458123  | H         | -3.822340 | -2.760095 | -2.698264 |
| H          | -0.368031 | -5.341532 | 3.225896  | H         | -3.198631 | -4.127519 | -1.719526 |
| O          | -3.691510 | -2.692113 | 2.031762  | H         | -3.642247 | -2.621394 | -0.911507 |
| O          | -2.187108 | -2.648673 | -0.282194 | H         | -0.880473 | -4.545741 | 6.276762  |
| O          | -1.285500 | -4.942386 | 0.434996  | H         | -2.632894 | -4.604755 | 6.554114  |
| O          | 0.926130  | -2.948416 | 3.398325  | <b>IV</b> |           |           |           |
| H          | -1.757348 | -4.250862 | -0.097419 | C         | -3.491457 | -0.941606 | -2.688237 |
| C          | 1.225020  | -1.028091 | 2.044130  | C         | -3.130007 | -0.615944 | -1.383310 |
| H          | 0.681627  | -0.220178 | 2.546297  | C         | -3.450311 | 0.630208  | -0.823159 |
| H          | 2.241690  | -1.046555 | 2.445629  | C         | -4.158839 | 1.553382  | -1.605301 |
| H          | 1.255802  | -0.797368 | 0.975060  | C         | -4.543031 | 1.237833  | -2.904357 |
| H          | -2.880663 | -5.016324 | 6.871759  | C         | -4.207158 | -0.009234 | -3.442187 |
| H          | -2.649754 | -6.275251 | 5.641418  | H         | -3.225618 | -1.905558 | -3.103407 |
| <b>III</b> |           |           |           | H         | -4.385728 | 2.519527  | -1.165981 |
| C          | -2.325056 | 1.028424  | 1.785745  | H         | -5.091018 | 1.960325  | -3.501669 |
| C          | -1.770778 | -0.222498 | 1.559182  | H         | -4.497024 | -0.261369 | -4.458397 |
| C          | -1.274492 | -0.612921 | 0.304618  | O         | -3.263377 | 2.087477  | 1.054473  |
| C          | -1.355232 | 0.320651  | -0.743367 | O         | -2.332978 | -1.458260 | -0.610720 |

|   |           |           |           |   |           |           |           |
|---|-----------|-----------|-----------|---|-----------|-----------|-----------|
| C | -2.599651 | -2.796776 | -0.511165 |   |           |           |           |
| C | -1.587807 | -3.427690 | 0.294846  | V |           |           |           |
| C | -0.744207 | -3.986155 | 0.960795  | C | -3.413088 | -1.539428 | -2.628803 |
| O | -3.543788 | -3.357649 | -1.018578 | C | -2.723741 | -0.929670 | -1.582812 |
| C | 0.279183  | -4.644883 | 1.760703  | C | -2.743427 | 0.460027  | -1.384297 |
| H | 1.195828  | -4.044744 | 1.796756  | C | -3.528146 | 1.237373  | -2.246097 |
| H | -0.072536 | -4.788371 | 2.789352  | C | -4.236989 | 0.639771  | -3.289121 |
| H | 0.524174  | -5.630491 | 1.348376  | C | -4.169995 | -0.740552 | -3.487707 |
| C | -3.044859 | 0.992273  | 0.558617  | H | -3.376401 | -2.613104 | -2.754119 |
| H | -2.546757 | 0.200325  | 1.139426  | H | -3.580647 | 2.311936  | -2.089671 |
| P | -0.033309 | 1.231495  | -0.613624 | H | -4.843423 | 1.258042  | -3.945143 |
| C | 1.127952  | 0.029288  | -1.391534 | H | -4.716780 | -1.206892 | -4.302525 |
| C | 1.143356  | -1.274083 | -0.870933 | O | -2.545097 | 2.131762  | 0.432603  |
| C | 1.966881  | 0.337062  | -2.473298 | O | -1.914630 | -1.650019 | -0.697532 |
| C | 1.990269  | -2.245400 | -1.407474 | C | -2.246003 | -2.880895 | -0.213178 |
| H | 0.474548  | -1.531174 | -0.055087 | C | -1.230490 | -3.312895 | 0.715787  |
| C | 2.811322  | -0.635650 | -3.013487 | C | -0.412110 | -3.707109 | 1.517414  |
| H | 1.954188  | 1.337001  | -2.896906 | O | -3.233114 | -3.515113 | -0.506934 |
| C | 2.827244  | -1.928176 | -2.480866 | C | 0.565956  | -4.185637 | 2.485755  |
| H | 1.982890  | -3.253284 | -0.999931 | H | 1.415865  | -3.498445 | 2.567543  |
| H | 3.455973  | -0.384256 | -3.851945 | H | 0.107639  | -4.279996 | 3.477333  |
| H | 3.481004  | -2.685051 | -2.906291 | H | 0.945863  | -5.173029 | 2.198032  |
| C | -0.233681 | 2.475862  | -1.958747 | C | -1.953812 | 1.088193  | -0.248080 |
| C | 0.305209  | 3.769042  | -1.916234 | H | -1.716746 | 0.312005  | 0.486590  |
| C | -1.023454 | 2.107207  | -3.061238 | P | -0.217200 | 1.620192  | -0.851005 |
| C | 0.066386  | 4.670889  | -2.957710 | C | 0.646068  | 0.226172  | -1.637581 |
| H | 0.913531  | 4.074091  | -1.070643 | C | 0.879872  | -0.921614 | -0.863080 |
| C | -1.252040 | 3.002921  | -4.104405 | C | 1.116472  | 0.277619  | -2.956581 |
| H | -1.459640 | 1.113058  | -3.104634 | C | 1.547649  | -2.012793 | -1.411984 |
| C | -0.708858 | 4.290847  | -4.055259 | H | 0.537770  | -0.967801 | 0.164869  |
| H | 0.490994  | 5.670505  | -2.910047 | C | 1.789728  | -0.818169 | -3.501253 |
| H | -1.863608 | 2.698505  | -4.949890 | H | 0.973082  | 1.169936  | -3.554540 |
| H | -0.893131 | 4.993029  | -4.864042 | C | 2.000636  | -1.965056 | -2.733853 |
| C | 1.031876  | 2.123338  | 0.594773  | H | 1.705388  | -2.901710 | -0.808636 |
| C | 0.372029  | 2.882626  | 1.576551  | H | 2.151019  | -0.770161 | -4.524521 |
| C | 2.433291  | 2.081262  | 0.593231  | H | 2.520839  | -2.817751 | -3.161401 |
| C | 1.103035  | 3.603960  | 2.522324  | C | -0.328615 | 3.000320  | -1.999444 |
| H | -0.715229 | 2.908783  | 1.597667  | C | 0.085097  | 4.270958  | -1.577783 |
| C | 3.162753  | 2.793187  | 1.548826  | C | -0.908626 | 2.826748  | -3.267939 |
| H | 2.955614  | 1.491624  | -0.154025 | C | -0.080189 | 5.363951  | -2.427084 |
| C | 2.500348  | 3.559541  | 2.511582  | H | 0.475748  | 4.415151  | -0.578538 |
| H | 0.580627  | 4.192454  | 3.272001  | C | -1.061538 | 3.924967  | -4.109946 |
| H | 4.249070  | 2.751269  | 1.538437  | H | -1.262811 | 1.853233  | -3.587129 |
| H | 3.069479  | 4.114624  | 3.252724  | C | -0.648730 | 5.192544  | -3.689934 |

|           |           |           |           |   |           |           |           |
|-----------|-----------|-----------|-----------|---|-----------|-----------|-----------|
| H         | 0.210768  | 6.352055  | -2.086381 | O | -1.508855 | 2.626690  | -2.080935 |
| H         | -1.518518 | 3.792586  | -5.086539 | O | -0.700899 | -1.119946 | -0.496198 |
| H         | -0.787358 | 6.050433  | -4.342183 | C | 0.472256  | -0.599235 | 0.104844  |
| C         | 0.785899  | 2.056873  | 0.589574  | C | 1.525549  | -1.512340 | 0.069404  |
| C         | 0.190349  | 2.531145  | 1.766793  | C | 2.647357  | -1.763522 | -0.586144 |
| C         | 2.184204  | 1.929649  | 0.499996  | O | 0.448355  | 0.494922  | 0.677961  |
| C         | 1.001774  | 2.861096  | 2.854798  | C | 3.675782  | -2.811486 | -0.208397 |
| H         | -0.880770 | 2.679581  | 1.810680  | H | 3.888150  | -3.507068 | -1.029783 |
| C         | 2.981138  | 2.270290  | 1.589703  | H | 4.631696  | -2.361863 | 0.094378  |
| H         | 2.645044  | 1.562635  | -0.412082 | H | 3.284066  | -3.376780 | 0.640987  |
| C         | 2.388133  | 2.732960  | 2.770508  | P | 3.101114  | -0.707835 | -2.021828 |
| H         | 0.539503  | 3.241488  | 3.760591  | C | 4.315924  | -1.492276 | -3.129179 |
| H         | 4.061029  | 2.174638  | 1.518682  | C | 5.638215  | -1.677493 | -2.690536 |
| H         | 3.011700  | 3.000283  | 3.619609  | C | 3.930884  | -1.986371 | -4.383914 |
| C         | -1.368249 | 7.143285  | 1.618422  | C | 6.558841  | -2.342394 | -3.497500 |
| H         | -1.792658 | 8.103316  | 1.306366  | H | 5.949622  | -1.296521 | -1.722418 |
| H         | -0.273439 | 7.213760  | 1.609403  | C | 4.856657  | -2.655479 | -5.187644 |
| H         | -1.668958 | 6.943862  | 2.654309  | H | 2.914423  | -1.843922 | -4.735690 |
| C         | -1.807258 | 5.969476  | 0.739446  | C | 6.169389  | -2.834904 | -4.747625 |
| C         | -2.714918 | 6.256683  | -0.321294 | H | 7.579501  | -2.477133 | -3.150766 |
| H         | -2.995923 | 7.295920  | -0.461425 | H | 4.549928  | -3.031656 | -6.159539 |
| C         | -3.283131 | 5.326386  | -1.206561 | H | 6.888131  | -3.354452 | -5.375039 |
| C         | -4.168236 | 5.859431  | -2.326962 | C | 1.640724  | -0.337502 | -3.024358 |
| H         | -4.269036 | 6.949193  | -2.314760 | C | 1.545985  | 0.888627  | -3.701286 |
| H         | -3.745199 | 5.551773  | -3.291541 | C | 0.637478  | -1.304668 | -3.177605 |
| H         | -5.164543 | 5.406923  | -2.250948 | C | 0.451080  | 1.144098  | -4.525301 |
| O         | -1.321703 | 4.846229  | 1.002467  | H | 2.308324  | 1.648674  | -3.563814 |
| O         | -3.139564 | 4.063218  | -1.191615 | C | -0.457222 | -1.039450 | -4.000423 |
| H         | -2.698165 | 2.971641  | -0.121981 | H | 0.693946  | -2.238618 | -2.629893 |
|           |           |           |           | C | -0.550216 | 0.180830  | -4.674103 |
|           |           |           |           | H | 0.362312  | 2.105566  | -5.020785 |
|           |           |           |           | H | -1.246989 | -1.778716 | -4.095028 |
|           |           |           |           | H | -1.415342 | 0.392559  | -5.295779 |
|           |           |           |           | C | 3.820110  | 0.874942  | -1.495206 |
|           |           |           |           | C | 3.291615  | 1.515183  | -0.362714 |
|           |           |           |           | C | 4.836644  | 1.492046  | -2.243106 |
|           |           |           |           | C | 3.791880  | 2.762089  | 0.016258  |
|           |           |           |           | H | 2.480176  | 1.070225  | 0.207359  |
|           |           |           |           | C | 5.331703  | 2.735776  | -1.850817 |
|           |           |           |           | H | 5.239846  | 1.007698  | -3.126511 |
|           |           |           |           | C | 4.810993  | 3.371106  | -0.719651 |
|           |           |           |           | H | 3.374096  | 3.255983  | 0.888628  |
|           |           |           |           | H | 6.119869  | 3.207941  | -2.430760 |
|           |           |           |           | H | 5.196473  | 4.340796  | -0.416591 |
| <b>VI</b> |           |           |           |   |           |           |           |
| C         | -2.847210 | -1.215980 | 0.495155  |   |           |           |           |
| C         | -1.907143 | -0.498365 | -0.246045 |   |           |           |           |
| C         | -2.227773 | 0.765977  | -0.771459 |   |           |           |           |
| C         | -3.506770 | 1.294300  | -0.529137 |   |           |           |           |
| C         | -4.446070 | 0.584478  | 0.209817  |   |           |           |           |
| C         | -4.113029 | -0.677310 | 0.720327  |   |           |           |           |
| H         | -2.565590 | -2.188094 | 0.887476  |   |           |           |           |
| H         | -3.734307 | 2.273804  | -0.938953 |   |           |           |           |
| H         | -5.431202 | 1.004849  | 0.390986  |   |           |           |           |
| H         | -4.840280 | -1.240324 | 1.299478  |   |           |           |           |
| C         | -1.264329 | 1.534749  | -1.586424 |   |           |           |           |
| H         | -0.287995 | 1.062410  | -1.751874 |   |           |           |           |

|            |           |           |           |             |           |           |           |
|------------|-----------|-----------|-----------|-------------|-----------|-----------|-----------|
|            |           |           |           | H           | 0.543050  | -4.296417 | 2.014249  |
| <b>VII</b> |           |           |           | H           | 2.478520  | -1.348265 | 4.483123  |
| C          | -5.273612 | -0.376338 | 1.096800  | H           | 1.627618  | -3.662568 | 4.162669  |
| C          | -4.092278 | 0.013706  | 0.477268  | C           | 2.630305  | -0.295650 | -1.161889 |
| C          | -3.987248 | 0.161905  | -0.905767 | C           | 3.028202  | 0.645582  | -2.125303 |
| C          | -5.115887 | -0.102670 | -1.681549 | C           | 3.321397  | -1.509588 | -1.059642 |
| C          | -6.318748 | -0.496748 | -1.086774 | C           | 4.092857  | 0.368829  | -2.980421 |
| C          | -6.395669 | -0.630042 | 0.302412  | H           | 2.507669  | 1.595613  | -2.201876 |
| H          | -5.303718 | -0.475709 | 2.177431  | C           | 4.390737  | -1.782758 | -1.917035 |
| H          | -5.050023 | 0.016640  | -2.760844 | H           | 3.035442  | -2.239447 | -0.310103 |
| H          | -7.191957 | -0.693353 | -1.702698 | C           | 4.776001  | -0.847482 | -2.878657 |
| H          | -7.327350 | -0.932356 | 0.772509  | H           | 4.391961  | 1.103444  | -3.722689 |
| C          | -2.678446 | 0.679009  | -1.450599 | H           | 4.923132  | -2.725527 | -1.827238 |
| H          | -2.597418 | 0.445401  | -2.525167 | H           | 5.608404  | -1.060965 | -3.543475 |
| C          | -1.516409 | 0.173780  | -0.630058 |             |           |           |           |
| O          | -3.004229 | 0.259155  | 1.311570  | <b>VIII</b> |           |           |           |
| O          | -2.423655 | 1.989261  | -1.117294 | C           | -4.695950 | -1.610037 | -1.657197 |
| C          | -1.747076 | 0.381610  | 0.824613  | C           | -3.729348 | -1.512424 | -0.650324 |
| O          | -0.839918 | 0.562229  | 1.621153  | C           | -3.454310 | -0.294474 | -0.022047 |
| C          | -0.271881 | -0.151219 | -1.105257 | C           | -4.170622 | 0.838509  | -0.433332 |
| C          | -0.056751 | -0.493312 | -2.567502 | C           | -5.132426 | 0.761534  | -1.437246 |
| H          | 0.216589  | 0.385977  | -3.167148 | C           | -5.396074 | -0.472503 | -2.047648 |
| H          | 0.734339  | -1.236015 | -2.703801 | H           | -4.875194 | -2.577289 | -2.116374 |
| H          | -0.974668 | -0.909534 | -2.987774 | H           | -3.971008 | 1.783637  | 0.065191  |
| P          | 1.191981  | 0.095128  | -0.098272 | H           | -5.676982 | 1.650914  | -1.741491 |
| C          | 1.488249  | 1.829108  | 0.351571  | H           | -6.145935 | -0.546227 | -2.830756 |
| C          | 2.738059  | 2.203595  | 0.870021  | C           | -2.448127 | -0.212888 | 1.096118  |
| C          | 0.509549  | 2.797119  | 0.084224  | H           | -1.791358 | 0.654839  | 0.943198  |
| C          | 2.996574  | 3.542702  | 1.159890  | C           | -1.638478 | -1.463112 | 1.193383  |
| H          | 3.515340  | 1.460291  | 1.024625  | O           | -3.073488 | -2.675023 | -0.327555 |
| C          | 0.787293  | 4.136746  | 0.366291  | O           | -3.108380 | 0.144529  | 2.350683  |
| H          | -0.455585 | 2.528142  | -0.343756 | C           | -1.985802 | -2.648690 | 0.530890  |
| C          | 2.017925  | 4.510195  | 0.910706  | O           | -1.367559 | -3.729424 | 0.632523  |
| H          | 3.961904  | 3.829897  | 1.567520  | C           | -0.424848 | -1.440139 | 1.973793  |
| H          | 0.028522  | 4.885734  | 0.159089  | C           | -0.044999 | -0.441187 | 2.817894  |
| H          | 2.220539  | 5.554629  | 1.132485  | H           | 0.929098  | -0.403589 | 3.285446  |
| C          | 1.322621  | -1.060744 | 1.299842  | H           | -0.744606 | 0.353771  | 3.052747  |
| C          | 0.823373  | -2.357947 | 1.123996  | H           | -3.648682 | -0.620597 | 2.610626  |
| C          | 1.916888  | -0.697567 | 2.512488  | P           | 0.770183  | -2.804602 | 1.728752  |
| C          | 0.937585  | -3.293701 | 2.152760  | C           | 0.435160  | -4.314612 | 2.677033  |
| H          | 0.327983  | -2.626388 | 0.194820  | C           | 1.447906  | -5.271147 | 2.830655  |
| C          | 2.027900  | -1.637249 | 3.537846  | C           | -0.801299 | -4.493650 | 3.308067  |
| H          | 2.258884  | 0.318740  | 2.672528  | C           | 1.212803  | -6.418401 | 3.590351  |
| C          | 1.544547  | -2.936025 | 3.359226  | H           | 2.422134  | -5.117465 | 2.375638  |

|           |           |           |           |   |           |           |           |
|-----------|-----------|-----------|-----------|---|-----------|-----------|-----------|
| C         | -1.021169 | -5.629049 | 4.086618  | O | -0.853755 | 2.211880  | 4.240481  |
| H         | -1.583291 | -3.754353 | 3.180940  | C | -1.917280 | -2.509037 | 0.077903  |
| C         | -0.020711 | -6.596224 | 4.221146  | O | -1.334254 | -3.575087 | 0.209447  |
| H         | 1.996204  | -7.163394 | 3.697338  | C | -0.178815 | -1.198773 | 1.376397  |
| H         | -1.980145 | -5.763888 | 4.578562  | C | 0.149631  | -0.130414 | 2.138581  |
| H         | -0.201168 | -7.484943 | 4.819670  | H | 1.089316  | -0.049867 | 2.661155  |
| C         | 1.137716  | -3.049244 | -0.026922 | H | -0.516998 | 0.713458  | 2.253583  |
| C         | 1.099168  | -1.926578 | -0.864542 | H | -1.660187 | 1.846802  | 3.822016  |
| C         | 1.467279  | -4.305916 | -0.545411 | P | 0.961141  | -2.603061 | 1.416135  |
| C         | 1.399000  | -2.065925 | -2.221296 | C | 0.434973  | -3.975090 | 2.476527  |
| H         | 0.820874  | -0.956342 | -0.464113 | C | 1.370952  | -4.972251 | 2.793397  |
| C         | 1.772252  | -4.435144 | -1.899463 | C | -0.848775 | -4.014644 | 3.028103  |
| H         | 1.452130  | -5.182470 | 0.093196  | C | 1.005080  | -6.026619 | 3.629160  |
| C         | 1.739890  | -3.317066 | -2.738799 | H | 2.384772  | -4.917674 | 2.406578  |
| H         | 1.357061  | -1.196901 | -2.871864 | C | -1.201559 | -5.063004 | 3.876652  |
| H         | 2.018468  | -5.413189 | -2.303122 | H | -1.560108 | -3.221342 | 2.835092  |
| H         | 1.968987  | -3.424200 | -3.795417 | C | -0.284061 | -6.073849 | 4.168777  |
| C         | 2.362895  | -2.256325 | 2.459261  | H | 1.729030  | -6.800193 | 3.868777  |
| C         | 2.548084  | -2.345644 | 3.849325  | H | -2.194264 | -5.078055 | 4.316262  |
| C         | 3.392549  | -1.733790 | 1.664982  | H | -0.565800 | -6.889851 | 4.828498  |
| C         | 3.736671  | -1.908251 | 4.432333  | C | 1.379402  | -3.120326 | -0.268973 |
| H         | 1.762961  | -2.758052 | 4.475273  | C | 1.565970  | -2.116918 | -1.229800 |
| C         | 4.584367  | -1.302003 | 2.251159  | C | 1.528393  | -4.466578 | -0.618664 |
| H         | 3.271225  | -1.668216 | 0.589480  | C | 1.913551  | -2.463312 | -2.536362 |
| C         | 4.758105  | -1.385369 | 3.634021  | H | 1.431952  | -1.072794 | -0.960105 |
| H         | 3.865586  | -1.979304 | 5.508722  | C | 1.879421  | -4.805414 | -1.925105 |
| H         | 5.376644  | -0.903107 | 1.623835  | H | 1.341063  | -5.244742 | 0.113043  |
| H         | 5.686102  | -1.049061 | 4.088204  | C | 2.074520  | -3.806860 | -2.883655 |
|           |           |           |           | H | 2.052711  | -1.684376 | -3.280560 |
|           |           |           |           | H | 1.986307  | -5.851355 | -2.197869 |
|           |           |           |           | H | 2.341450  | -4.076167 | -3.901700 |
|           |           |           |           | C | 2.521017  | -2.067143 | 2.190754  |
|           |           |           |           | C | 2.527350  | -1.794501 | 3.570835  |
|           |           |           |           | C | 3.707873  | -1.969623 | 1.452279  |
|           |           |           |           | C | 3.714213  | -1.413446 | 4.193342  |
|           |           |           |           | H | 1.606179  | -1.832578 | 4.146696  |
|           |           |           |           | C | 4.894682  | -1.597367 | 2.088327  |
|           |           |           |           | H | 3.713715  | -2.188336 | 0.390109  |
|           |           |           |           | C | 4.898904  | -1.318131 | 3.456133  |
|           |           |           |           | H | 3.708008  | -1.184525 | 5.254908  |
|           |           |           |           | H | 5.812742  | -1.526323 | 1.511925  |
|           |           |           |           | H | 5.822253  | -1.024144 | 3.947586  |
|           |           |           |           | C | -1.006997 | -2.304577 | 6.078649  |
|           |           |           |           | H | -1.844962 | -2.963264 | 6.326577  |
| <b>IX</b> |           |           |           |   |           |           |           |
| C         | -5.084965 | -1.556217 | -1.462184 |   |           |           |           |
| C         | -3.867491 | -1.407440 | -0.801028 |   |           |           |           |
| C         | -3.422002 | -0.160574 | -0.333882 |   |           |           |           |
| C         | -4.245950 | 0.964165  | -0.539008 |   |           |           |           |
| C         | -5.462540 | 0.831544  | -1.192785 |   |           |           |           |
| C         | -5.879550 | -0.428772 | -1.655103 |   |           |           |           |
| H         | -5.389587 | -2.539742 | -1.804531 |   |           |           |           |
| H         | -3.920035 | 1.925396  | -0.152825 |   |           |           |           |
| H         | -6.097607 | 1.699659  | -1.340302 |   |           |           |           |
| H         | -6.833640 | -0.529765 | -2.164204 |   |           |           |           |
| C         | -2.166872 | -0.105775 | 0.351455  |   |           |           |           |
| H         | -1.818975 | 0.861873  | 0.687295  |   |           |           |           |
| C         | -1.431184 | -1.234742 | 0.589363  |   |           |           |           |
| O         | -3.105131 | -2.528812 | -0.610118 |   |           |           |           |



|          |           |           |           |            |           |           |           |
|----------|-----------|-----------|-----------|------------|-----------|-----------|-----------|
| H        | -0.723347 | -1.742426 | 6.976659  | H          | 1.531654  | -7.544263 | 3.678314  |
| H        | -0.146190 | -2.919868 | 5.792525  | H          | -2.518236 | -6.162727 | 4.159509  |
| C        | -1.324194 | -1.309193 | 4.962393  | H          | -0.779385 | -7.904140 | 4.529966  |
| C        | -2.646970 | -1.316771 | 4.452686  | C          | 1.106049  | -3.412101 | 0.068581  |
| H        | -3.302637 | -2.071283 | 4.877625  | C          | 1.243294  | -2.313576 | -0.790716 |
| C        | -3.256991 | -0.445693 | 3.509182  | C          | 1.391841  | -4.698641 | -0.401006 |
| C        | -4.697458 | -0.766667 | 3.110974  | C          | 1.688428  | -2.498171 | -2.100697 |
| H        | -5.132479 | -1.595832 | 3.677519  | H          | 0.980263  | -1.320794 | -0.435200 |
| H        | -5.315689 | 0.128045  | 3.245724  | C          | 1.835722  | -4.879782 | -1.711539 |
| H        | -4.728722 | -1.016085 | 2.043314  | H          | 1.241532  | -5.561161 | 0.238240  |
| O        | -0.361814 | -0.580494 | 4.589579  | C          | 1.990335  | -3.781703 | -2.562039 |
| O        | -2.740640 | 0.560958  | 2.955629  | H          | 1.788374  | -1.641210 | -2.761266 |
| H        | -0.465400 | 1.387795  | 4.591678  | H          | 2.048132  | -5.882534 | -2.072314 |
|          |           |           |           | H          | 2.330903  | -3.927689 | -3.583478 |
| <b>X</b> |           |           |           | C          | 2.072356  | -2.621580 | 2.686408  |
| C        | -5.230835 | -1.548025 | -1.230388 | C          | 2.118569  | -2.786807 | 4.079675  |
| C        | -4.095330 | -1.510808 | -0.428303 | C          | 3.172571  | -2.055714 | 2.030272  |
| C        | -3.737842 | -0.387525 | 0.336846  | C          | 3.234406  | -2.371922 | 4.804547  |
| C        | -4.595164 | 0.734442  | 0.273152  | H          | 1.282663  | -3.245985 | 4.598421  |
| C        | -5.734774 | 0.714728  | -0.520920 | C          | 4.292684  | -1.646229 | 2.757421  |
| C        | -6.056352 | -0.424868 | -1.277154 | H          | 3.158618  | -1.931004 | 0.952959  |
| H        | -5.450636 | -2.446291 | -1.798948 | C          | 4.323539  | -1.796702 | 4.144624  |
| H        | -4.344685 | 1.614533  | 0.859791  | H          | 3.253112  | -2.496078 | 5.883785  |
| H        | -6.381257 | 1.587146  | -0.556942 | H          | 5.138314  | -1.205380 | 2.237012  |
| H        | -6.947408 | -0.436439 | -1.897743 | H          | 5.191106  | -1.468129 | 4.709844  |
| C        | -2.545828 | -0.440808 | 1.123429  | C          | -0.241745 | 0.539311  | 6.587886  |
| H        | -2.299951 | 0.439245  | 1.704801  | H          | -1.061828 | 1.266555  | 6.614867  |
| C        | -1.736471 | -1.565077 | 1.161067  | H          | 0.578873  | 0.906681  | 7.208398  |
| O        | -3.304574 | -2.638436 | -0.390327 | H          | -0.626906 | -0.405705 | 6.989418  |
| C        | -2.183898 | -2.728258 | 0.373822  | C          | 0.223695  | 0.387636  | 5.153893  |
| O        | -1.597789 | -3.803793 | 0.379640  | C          | -0.605828 | -0.543053 | 4.255590  |
| C        | -0.527409 | -1.697474 | 1.924483  | H          | -0.475630 | -1.557756 | 4.657207  |
| C        | -0.081892 | -0.537212 | 2.788280  | C          | -2.088503 | -0.186119 | 4.323841  |
| H        | 1.002772  | -0.484925 | 2.869097  | C          | -3.067812 | -1.333036 | 4.394303  |
| H        | -0.371374 | 0.415527  | 2.330189  | H          | -2.812874 | -2.084973 | 3.640933  |
| P        | 0.541824  | -3.064376 | 1.774691  | H          | -2.985006 | -1.818169 | 5.377176  |
| C        | 0.099362  | -4.644700 | 2.598572  | H          | -4.088998 | -0.975785 | 4.247909  |
| C        | 1.081673  | -5.620114 | 2.824757  | O          | 1.220757  | 0.952837  | 4.746130  |
| C        | -1.193524 | -4.846584 | 3.090450  | O          | -2.447112 | 0.982164  | 4.313432  |
| C        | 0.764262  | -6.793304 | 3.511195  |            |           |           |           |
| H        | 2.100657  | -5.456966 | 2.485689  | <b>XII</b> |           |           |           |
| C        | -1.509014 | -6.014916 | 3.785047  | C          | -5.982000 | -0.955000 | 0.099882  |
| H        | -1.950679 | -4.089726 | 2.924924  | C          | -4.615880 | -0.905553 | 0.376047  |
| C        | -0.532747 | -6.993057 | 3.991615  | C          | -4.062601 | 0.095609  | 1.189989  |

|   |           |           |           |             |           |           |           |
|---|-----------|-----------|-----------|-------------|-----------|-----------|-----------|
| C | -4.923891 | 1.066457  | 1.734539  | H           | 3.218775  | -5.999882 | -0.674411 |
| C | -6.286177 | 1.026414  | 1.473847  | H           | 3.069765  | -5.081481 | -2.984502 |
| C | -6.812620 | 0.015196  | 0.652419  | C           | -1.857139 | -0.862627 | 0.837308  |
| H | -6.364727 | -1.741361 | -0.542319 | C           | 0.303905  | 0.280910  | 1.654836  |
| H | -4.497524 | 1.859030  | 2.343364  | H           | -0.312265 | 0.562530  | 2.513910  |
| H | -6.943127 | 1.783425  | 1.891214  | H           | 1.272023  | -0.007703 | 2.060282  |
| H | -7.877463 | -0.009542 | 0.439588  | C           | 0.532435  | 1.472674  | 0.703720  |
| C | -2.641857 | 0.091290  | 1.398493  | C           | 0.769201  | 2.748442  | 1.508796  |
| H | -2.221862 | 0.893748  | 1.991143  | C           | 1.688373  | 1.179943  | -0.250752 |
| O | -3.828014 | -1.884585 | -0.161686 | C           | -0.469176 | 3.447572  | 2.029131  |
| C | -2.465229 | -1.878208 | -0.018109 | H           | -0.196184 | 4.408221  | 2.471948  |
| O | -1.830522 | -2.763068 | -0.570513 | H           | -1.199297 | 3.567839  | 1.220741  |
| P | 0.350699  | -2.559680 | 1.323292  | H           | -0.950577 | 2.829890  | 2.799860  |
| C | -0.938118 | -3.625903 | 2.021578  | C           | 1.893152  | 2.158168  | -1.374006 |
| C | -1.164335 | -4.916526 | 1.530356  | H           | 2.832256  | 1.947716  | -1.890639 |
| C | -1.746700 | -3.114654 | 3.048340  | H           | 1.050849  | 2.025114  | -2.063966 |
| C | -2.182230 | -5.697197 | 2.077645  | H           | 1.882756  | 3.190628  | -1.011237 |
| H | -0.573041 | -5.295378 | 0.704354  | O           | 1.893329  | 3.172944  | 1.728309  |
| C | -2.767578 | -3.898113 | 3.587462  | O           | 2.364394  | 0.165081  | -0.139838 |
| H | -1.590869 | -2.106463 | 3.420112  | C           | -0.346972 | -0.881906 | 0.881882  |
| C | -2.984020 | -5.190797 | 3.104064  | H           | -0.051420 | -0.773975 | -0.170696 |
| H | -2.360478 | -6.695141 | 1.687938  | C           | -1.629387 | -1.167928 | -3.548762 |
| H | -3.395266 | -3.494831 | 4.376844  | H           | -1.600006 | -2.142929 | -3.045993 |
| H | -3.783051 | -5.798365 | 3.519457  | H           | -0.748912 | -1.099265 | -4.198169 |
| C | 1.650222  | -2.435692 | 2.597907  | H           | -2.534954 | -1.122531 | -4.161793 |
| C | 2.892827  | -1.890920 | 2.227559  | C           | -1.560272 | -0.067679 | -2.491151 |
| C | 1.452899  | -2.894238 | 3.907736  | C           | -2.744055 | 0.680848  | -2.269822 |
| C | 3.915036  | -1.794685 | 3.169501  | H           | -3.579021 | 0.441588  | -2.921710 |
| H | 3.045861  | -1.518439 | 1.220237  | C           | -2.949030 | 1.770857  | -1.382996 |
| C | 2.485398  | -2.797440 | 4.843646  | C           | -4.271141 | 2.526532  | -1.525430 |
| H | 0.508929  | -3.339508 | 4.199940  | H           | -5.024002 | 1.972454  | -2.095386 |
| C | 3.714393  | -2.245989 | 4.477691  | H           | -4.668623 | 2.763070  | -0.534105 |
| H | 4.867374  | -1.361022 | 2.879030  | H           | -4.080911 | 3.477717  | -2.039942 |
| H | 2.326263  | -3.158364 | 5.855871  | O           | -0.453342 | 0.071465  | -1.898334 |
| H | 4.515182  | -2.169827 | 5.208036  | O           | -2.155833 | 2.184862  | -0.497032 |
| C | 1.179890  | -3.334461 | -0.085260 | H           | -0.366728 | 1.624804  | 0.083982  |
| C | 1.099724  | -2.808503 | -1.380767 |             |           |           |           |
| C | 1.954910  | -4.479274 | 0.170132  |             |           |           |           |
| C | 1.787723  | -3.444347 | -2.415724 | <b>XIII</b> |           |           |           |
| H | 0.528811  | -1.912234 | -1.602679 | C           | -5.655031 | -0.628797 | -0.431418 |
| C | 2.624740  | -5.112641 | -0.874246 | C           | -4.310601 | -0.644399 | -0.064360 |
| H | 2.044582  | -4.866989 | 1.181264  | C           | -3.702403 | 0.446534  | 0.576103  |
| C | 2.540387  | -4.593730 | -2.170450 | C           | -4.482854 | 1.589838  | 0.840332  |
| H | 1.730650  | -3.028314 | -3.417170 | C           | -5.823254 | 1.620324  | 0.480654  |
|   |           |           |           | C           | -6.407113 | 0.509684  | -0.152632 |

|   |           |           |           |            |           |           |           |
|---|-----------|-----------|-----------|------------|-----------|-----------|-----------|
| H | -6.083532 | -1.493917 | -0.926670 | C          | 0.404512  | 0.179574  | 1.966217  |
| H | -4.014944 | 2.443946  | 1.322242  | H          | -0.333554 | 0.278913  | 2.766937  |
| H | -6.420265 | 2.503911  | 0.684113  | H          | 1.312683  | -0.193921 | 2.442369  |
| H | -7.455636 | 0.537746  | -0.434493 | C          | 0.681410  | 1.504219  | 1.281166  |
| C | -2.314814 | 0.336257  | 0.924666  | C          | 0.164766  | 2.733426  | 1.817324  |
| H | -1.837482 | 1.191537  | 1.382432  | C          | 1.591472  | 1.445973  | 0.185435  |
| O | -3.581251 | -1.765518 | -0.355994 | C          | -0.506841 | 2.706045  | 3.206685  |
| C | -2.242276 | -1.875051 | -0.069219 | H          | -0.661863 | 3.741781  | 3.517088  |
| O | -1.676897 | -2.896100 | -0.426561 | H          | -1.485984 | 2.205941  | 3.200160  |
| P | 0.477828  | -2.600936 | 1.368999  | H          | 0.110516  | 2.194034  | 3.955661  |
| C | -0.801417 | -3.505067 | 2.275105  | C          | 1.988189  | 2.687638  | -0.588139 |
| C | -1.223839 | -4.785691 | 1.901655  | H          | 2.756144  | 2.405198  | -1.314360 |
| C | -1.400640 | -2.855542 | 3.365317  | H          | 1.124224  | 3.122487  | -1.102256 |
| C | -2.228641 | -5.421535 | 2.631028  | H          | 2.355093  | 3.475177  | 0.077546  |
| H | -0.794614 | -5.267282 | 1.030290  | O          | 0.239776  | 3.848541  | 1.261847  |
| C | -2.409625 | -3.494686 | 4.086559  | O          | 2.114750  | 0.341840  | -0.177821 |
| H | -1.083438 | -1.856281 | 3.650596  | C          | -0.111190 | -0.888152 | 0.948110  |
| C | -2.820866 | -4.779468 | 3.722180  | H          | 0.474463  | -0.686365 | 0.038407  |
| H | -2.559475 | -6.413169 | 2.336304  |            |           |           |           |
| H | -2.873790 | -2.987733 | 4.927536  | <b>XIV</b> |           |           |           |
| H | -3.608073 | -5.276022 | 4.282481  | C          | -5.227928 | -0.593609 | -0.416025 |
| C | 1.933460  | -2.516026 | 2.460792  | C          | -3.869788 | -0.558570 | -0.076540 |
| C | 3.073335  | -1.840639 | 1.986406  | C          | -3.204809 | 0.665883  | 0.078284  |
| C | 1.968668  | -3.184773 | 3.689995  | C          | -3.932235 | 1.848336  | -0.102499 |
| C | 4.233257  | -1.833781 | 2.756988  | C          | -5.281601 | 1.827096  | -0.450176 |
| H | 3.030172  | -1.285728 | 1.050586  | C          | -5.927931 | 0.594815  | -0.607111 |
| C | 3.140757  | -3.174029 | 4.452179  | H          | -5.707058 | -1.560822 | -0.532478 |
| H | 1.094526  | -3.713312 | 4.055169  | H          | -3.423746 | 2.801574  | 0.025578  |
| C | 4.270856  | -2.500541 | 3.987270  | H          | -5.823710 | 2.756836  | -0.596577 |
| H | 5.107210  | -1.298530 | 2.397407  | H          | -6.979864 | 0.560127  | -0.877866 |
| H | 3.165250  | -3.692802 | 5.406418  | C          | -1.760331 | 0.673229  | 0.473780  |
| H | 5.179923  | -2.490881 | 4.582417  | H          | -1.649862 | 1.394622  | 1.296823  |
| C | 1.132882  | -3.522711 | -0.049174 | O          | -3.251526 | -1.769946 | 0.057598  |
| C | 1.115342  | -3.001885 | -1.347025 | C          | -1.892583 | -1.867841 | 0.463043  |
| C | 1.758395  | -4.753056 | 0.205672  | O          | -1.433281 | -3.017305 | 0.426304  |
| C | 1.707541  | -3.718885 | -2.386458 | P          | 0.784437  | -0.523979 | 2.711841  |
| H | 0.655320  | -2.044256 | -1.553966 | C          | -0.188858 | 0.766968  | 3.515581  |
| C | 2.328959  | -5.474935 | -0.841657 | C          | -1.494610 | 0.436112  | 3.916222  |
| H | 1.814573  | -5.140231 | 1.219252  | C          | 0.249635  | 2.098072  | 3.583113  |
| C | 2.304710  | -4.956817 | -2.139431 | C          | -2.354964 | 1.438786  | 4.363753  |
| H | 1.700971  | -3.304970 | -3.390281 | H          | -1.838135 | -0.590078 | 3.851803  |
| H | 2.803929  | -6.430948 | -0.640775 | C          | -0.610402 | 3.091244  | 4.051625  |
| H | 2.760060  | -5.512621 | -2.954340 | H          | 1.251812  | 2.362863  | 3.261908  |
| C | -1.591764 | -0.783756 | 0.650376  | C          | -1.915436 | 2.763397  | 4.431414  |

|   |           |           |           |    |           |           |           |
|---|-----------|-----------|-----------|----|-----------|-----------|-----------|
| H | -3.370700 | 1.184474  | 4.651241  |    |           |           |           |
| H | -0.266958 | 4.120379  | 4.103658  | XV |           |           |           |
| H | -2.589527 | 3.540815  | 4.779967  | C  | -5.178954 | -1.503715 | -1.625598 |
| C | 2.548870  | -0.101647 | 2.841809  | C  | -4.153125 | -1.463645 | -0.687939 |
| C | 3.396853  | -0.444881 | 1.777400  | C  | -3.943868 | -0.371691 | 0.171787  |
| C | 3.089279  | 0.493959  | 3.992454  | C  | -4.841107 | 0.714748  | 0.055676  |
| C | 4.766074  | -0.188512 | 1.862084  | C  | -5.873530 | 0.692158  | -0.873496 |
| H | 2.995499  | -0.910431 | 0.882918  | C  | -6.046583 | -0.415733 | -1.719705 |
| C | 4.458061  | 0.748602  | 4.071981  | H  | -5.284147 | -2.378365 | -2.259959 |
| H | 2.445052  | 0.765573  | 4.822856  | H  | -4.706640 | 1.574263  | 0.707887  |
| C | 5.297632  | 0.408765  | 3.007099  | H  | -6.550998 | 1.538473  | -0.946060 |
| H | 5.413977  | -0.454708 | 1.032144  | H  | -6.854079 | -0.430294 | -2.445481 |
| H | 4.868360  | 1.212011  | 4.964762  | C  | -2.851469 | -0.419780 | 1.091813  |
| H | 6.363348  | 0.609307  | 3.070634  | H  | -2.721207 | 0.434907  | 1.746778  |
| C | 0.517761  | -2.060529 | 3.625901  | C  | -1.976620 | -1.498073 | 1.152580  |
| C | 0.076781  | -3.226441 | 2.987849  | O  | -3.321162 | -2.559125 | -0.606788 |
| C | 0.796373  | -2.065205 | 5.004913  | C  | -2.289702 | -2.640216 | 0.272626  |
| C | -0.077226 | -4.396076 | 3.739575  | O  | -1.661420 | -3.691342 | 0.297322  |
| H | -0.203942 | -3.227312 | 1.935481  | C  | -0.832616 | -1.609169 | 2.004644  |
| C | 0.641382  | -3.236653 | 5.740094  | C  | -0.395384 | -0.391180 | 2.814080  |
| H | 1.122250  | -1.157948 | 5.505378  | H  | 0.665656  | -0.221379 | 2.623630  |
| C | 0.206945  | -4.406673 | 5.104898  | H  | -0.881428 | 0.491000  | 2.379757  |
| H | -0.433896 | -5.294424 | 3.244439  | P  | 0.273469  | -2.957898 | 1.939238  |
| H | 0.854143  | -3.237554 | 6.805428  | C  | -0.216647 | -4.560002 | 2.687666  |
| H | 0.083477  | -5.320139 | 5.680418  | C  | 0.773656  | -5.472633 | 3.082204  |
| C | -1.262295 | -0.687772 | 0.863628  | C  | -1.560451 | -4.857053 | 2.938546  |
| C | 0.625060  | 0.723682  | 0.220672  | C  | 0.420539  | -6.672926 | 3.700673  |
| H | 0.861884  | 1.512717  | 0.939779  | H  | 1.823031  | -5.241442 | 2.925325  |
| H | 1.485916  | 0.587196  | -0.433470 | C  | -1.911831 | -6.051573 | 3.567923  |
| C | -0.636105 | 1.112883  | -0.582402 | H  | -2.329256 | -4.159157 | 2.634585  |
| C | -0.685218 | 2.587455  | -0.949372 | C  | -0.923678 | -6.963901 | 3.946069  |
| C | -0.678469 | 0.257684  | -1.876281 | H  | 1.196085  | -7.373067 | 3.998972  |
| C | -0.458576 | 3.620131  | 0.143832  | H  | -2.958836 | -6.269891 | 3.758856  |
| H | -0.931448 | 4.558780  | -0.155514 | H  | -1.199051 | -7.894458 | 4.434788  |
| H | -0.832816 | 3.303296  | 1.120682  | C  | 1.030856  | -3.272074 | 0.300483  |
| H | 0.619550  | 3.801279  | 0.245577  | C  | 1.193289  | -2.170882 | -0.550006 |
| C | -1.945661 | 0.169917  | -2.691857 | C  | 1.451959  | -4.538711 | -0.116998 |
| H | -2.479051 | -0.744552 | -2.405444 | C  | 1.792326  | -2.331832 | -1.800270 |
| H | -2.609391 | 1.020698  | -2.546134 | H  | 0.831336  | -1.195134 | -0.236192 |
| H | -1.667206 | 0.082097  | -3.745265 | C  | 2.049263  | -4.697042 | -1.368650 |
| O | -0.903495 | 2.953370  | -2.095644 | H  | 1.293658  | -5.404447 | 0.516575  |
| O | 0.322454  | -0.347925 | -2.222875 | C  | 2.225179  | -3.595492 | -2.210326 |
| C | 0.229458  | -0.615749 | 0.939347  | H  | 1.910781  | -1.473400 | -2.455928 |
| H | 0.710491  | -1.492574 | 0.491060  | H  | 2.366792  | -5.685068 | -1.690829 |

|            |           |           |           |   |           |           |           |
|------------|-----------|-----------|-----------|---|-----------|-----------|-----------|
| H          | 2.685857  | -3.723636 | -3.186006 | C | -1.106902 | -1.700876 | 2.793946  |
| C          | 1.711437  | -2.512160 | 2.994825  | C | -0.597921 | -0.295300 | 3.208807  |
| C          | 1.602566  | -2.622653 | 4.390365  | H | 0.410833  | -0.089914 | 2.843442  |
| C          | 2.920330  | -2.073789 | 2.437924  | H | -1.244047 | 0.461728  | 2.757424  |
| C          | 2.677183  | -2.287407 | 5.212889  | P | 0.376498  | -2.965087 | 2.712012  |
| H          | 0.678603  | -2.973244 | 4.836619  | C | 0.116750  | -4.797204 | 2.794978  |
| C          | 3.999585  | -1.744985 | 3.263288  | C | 0.994829  | -5.673525 | 2.142826  |
| H          | 3.027669  | -1.996810 | 1.361495  | C | -0.947807 | -5.329662 | 3.535275  |
| C          | 3.878942  | -1.848122 | 4.650518  | C | 0.824917  | -7.055600 | 2.242038  |
| H          | 2.569707  | -2.358746 | 6.290883  | H | 1.812331  | -5.287370 | 1.546435  |
| H          | 4.932569  | -1.409965 | 2.818425  | C | -1.137376 | -6.710591 | 3.605457  |
| H          | 4.715851  | -1.586843 | 5.292186  | H | -1.638416 | -4.664885 | 4.035766  |
| C          | 1.539413  | 1.112604  | 4.435365  | C | -0.247497 | -7.578394 | 2.968059  |
| H          | 2.246967  | 0.444442  | 3.931490  | H | 1.524877  | -7.719775 | 1.742029  |
| H          | 2.077602  | 1.683265  | 5.194796  | H | -1.983452 | -7.105565 | 4.161126  |
| H          | 1.133030  | 1.794181  | 3.679884  | H | -0.390400 | -8.653784 | 3.033227  |
| C          | 0.449108  | 0.316578  | 5.121089  | C | 0.427053  | -2.887148 | 0.783194  |
| C          | -0.561271 | -0.377462 | 4.336974  | C | 1.016644  | -1.787559 | 0.139344  |
| C          | -1.610579 | -0.968844 | 5.019391  | C | -0.341593 | -3.758589 | -0.002955 |
| C          | -2.802750 | -1.648401 | 4.422176  | C | 0.858173  | -1.571652 | -1.231735 |
| H          | -2.630942 | -2.730501 | 4.392374  | H | 1.605995  | -1.076112 | 0.711693  |
| H          | -3.661926 | -1.468502 | 5.075951  | C | -0.509234 | -3.548198 | -1.375315 |
| H          | -3.032353 | -1.311400 | 3.413991  | H | -0.836152 | -4.608883 | 0.455951  |
| O          | 0.459379  | 0.298881  | 6.378685  | C | 0.091453  | -2.453102 | -1.997092 |
| O          | -1.658469 | -0.994177 | 6.352094  | H | 1.328225  | -0.709562 | -1.699249 |
| H          | -0.827841 | -0.513356 | 6.679439  | H | -1.118727 | -4.238249 | -1.953299 |
|            |           |           |           | H | -0.045927 | -2.281654 | -3.061129 |
| <b>XVI</b> |           |           |           | C | 2.158448  | -2.440657 | 2.897185  |
| C          | -4.429477 | -2.086370 | -1.812231 | C | 2.564758  | -1.572764 | 3.922527  |
| C          | -3.629402 | -1.899322 | -0.684987 | C | 3.140363  | -2.922864 | 2.015652  |
| C          | -2.733909 | -0.822336 | -0.585873 | C | 3.899328  | -1.184557 | 4.052183  |
| C          | -2.657300 | 0.085221  | -1.659132 | H | 1.834919  | -1.202338 | 4.627112  |
| C          | -3.446925 | -0.088397 | -2.787445 | C | 4.481727  | -2.570640 | 2.168797  |
| C          | -4.331969 | -1.177460 | -2.862182 | H | 2.862477  | -3.560363 | 1.185984  |
| H          | -5.107700 | -2.932760 | -1.846585 | C | 4.866341  | -1.690611 | 3.182429  |
| H          | -1.960489 | 0.916555  | -1.592084 | H | 4.179407  | -0.489494 | 4.839006  |
| H          | -3.380895 | 0.614835  | -3.612188 | H | 5.221822  | -2.973129 | 1.482346  |
| H          | -4.949726 | -1.313425 | -3.745249 | H | 5.907838  | -1.399970 | 3.290292  |
| C          | -1.913407 | -0.740699 | 0.588515  | C | -0.127925 | 1.720941  | 6.541603  |
| H          | -1.196867 | 0.071813  | 0.648759  | H | -1.161642 | 2.048747  | 6.709481  |
| C          | -1.979711 | -1.673053 | 1.573289  | H | 0.547758  | 2.554264  | 6.745444  |
| O          | -3.748621 | -2.802746 | 0.332345  | H | 0.071183  | 0.897673  | 7.238250  |
| C          | -2.966460 | -2.753238 | 1.471537  | C | 0.028879  | 1.266738  | 5.104874  |
| O          | -3.157521 | -3.607603 | 2.314731  | C | -0.640299 | -0.057070 | 4.722949  |

|            |           |           |           |            |           |           |           |
|------------|-----------|-----------|-----------|------------|-----------|-----------|-----------|
| H          | -0.093529 | -0.858642 | 5.233111  | O          | -1.066027 | -0.721930 | -2.399368 |
| C          | -2.096381 | -0.105081 | 5.220163  | H          | -0.362515 | -0.282413 | -1.394643 |
| C          | -2.426796 | -1.140613 | 6.266780  | C          | -2.554298 | -2.567249 | -2.602289 |
| H          | -2.103164 | -2.129780 | 5.920571  | H          | -3.121734 | -2.268495 | -3.493348 |
| H          | -1.855569 | -0.933903 | 7.182120  | H          | -1.700107 | -3.161801 | -2.942688 |
| H          | -3.495716 | -1.136531 | 6.489487  | H          | -3.208592 | -3.172290 | -1.968400 |
| O          | 0.679832  | 1.908112  | 4.299935  |            |           |           |           |
| O          | -2.929427 | 0.657371  | 4.761577  | <b>TS2</b> |           |           |           |
| O          | 0.179306  | -2.898299 | 4.534896  | C          | -4.662976 | -2.103705 | 2.422332  |
| H          | -1.703365 | -2.136240 | 3.594250  | C          | -3.560937 | -1.855551 | 1.610083  |
| H          | 0.778976  | -3.530520 | 4.962618  | C          | -2.943417 | -2.837611 | 0.832186  |
|            |           |           |           | C          | -3.491344 | -4.126542 | 0.893959  |
| <b>TS1</b> |           |           |           | C          | -4.590183 | -4.406369 | 1.705505  |
| C          | -1.895000 | -1.467557 | 3.919688  | C          | -5.178376 | -3.397765 | 2.474745  |
| C          | -1.542219 | -1.730807 | 2.604438  | H          | -5.106457 | -1.295269 | 2.994798  |
| C          | -0.976436 | -0.747641 | 1.779421  | H          | -3.036010 | -4.912694 | 0.304162  |
| C          | -0.770988 | 0.537171  | 2.309155  | H          | -4.989549 | -5.416057 | 1.736980  |
| C          | -1.122658 | 0.815449  | 3.626684  | H          | -6.036504 | -3.611955 | 3.104874  |
| C          | -1.682769 | -0.184075 | 4.430236  | C          | -1.701083 | -2.512144 | -0.001492 |
| H          | -2.337330 | -2.250457 | 4.526002  | H          | -1.782122 | -1.462395 | -0.285569 |
| H          | -0.347720 | 1.296848  | 1.661280  | O          | -3.094071 | -0.520199 | 1.491083  |
| H          | -0.965014 | 1.811455  | 4.029184  | C          | -2.532341 | 0.085189  | 2.551529  |
| H          | -1.959724 | 0.033572  | 5.457622  | C          | -2.233413 | 1.459254  | 2.279461  |
| C          | -0.635223 | -1.046406 | 0.389571  | C          | -1.940715 | 2.619435  | 2.088898  |
| H          | -0.605894 | -2.094997 | 0.092876  | C          | -1.584566 | 4.011643  | 1.859826  |
| O          | -1.703043 | -3.011575 | 2.063931  | H          | -1.811732 | 4.620026  | 2.742742  |
| C          | -2.977478 | -3.429349 | 1.778969  | C          | -0.462559 | -2.684129 | 0.894896  |
| C          | -2.951059 | -4.702507 | 1.114300  | H          | -1.316166 | -4.113611 | -0.995937 |
| H          | -4.044774 | -7.452541 | -0.177612 | C          | 0.093214  | -4.034067 | 0.973532  |
| C          | -2.989042 | -5.761891 | 0.527648  | C          | 0.378464  | -1.521506 | 1.125794  |
| C          | -3.030758 | -7.037353 | -0.173968 | C          | 1.386395  | -4.324426 | 1.715619  |
| H          | -2.359840 | -7.763126 | 0.299953  | H          | 1.828805  | -5.222021 | 1.277153  |
| H          | -2.708620 | -6.912599 | -1.214732 | H          | 2.095055  | -3.494327 | 1.692351  |
| C          | -2.700782 | -0.906279 | -0.690990 | H          | 1.166535  | -4.539487 | 2.769197  |
| H          | -3.421133 | -1.600475 | -0.268592 | O          | -2.286164 | -0.462689 | 3.620748  |
| C          | -2.875662 | 0.495573  | -0.284521 | O          | -1.655987 | -3.223591 | -1.225720 |
| C          | -2.073196 | -1.321241 | -1.897682 | O          | -0.496267 | -4.987571 | 0.426926  |
| C          | -3.925710 | 0.727179  | 0.791724  | O          | 1.059023  | -1.387401 | 2.180548  |
| H          | -4.927333 | 0.637338  | 0.350496  | H          | -0.861582 | -2.815761 | 2.482576  |
| H          | -3.857893 | -0.019506 | 1.589834  | C          | 0.415086  | -0.381298 | 0.128200  |
| H          | -3.810271 | 1.732704  | 1.202069  | H          | -0.374889 | 0.346128  | 0.355703  |
| O          | -3.975020 | -2.794858 | 2.039940  | H          | 1.374196  | 0.132667  | 0.232957  |
| O          | -0.004646 | -0.172888 | -0.310228 | H          | 0.277172  | -0.724733 | -0.900453 |
| O          | -2.236030 | 1.428594  | -0.762493 | O          | -0.686569 | -2.595979 | 3.555289  |

|            |           |           |           |            |           |           |           |
|------------|-----------|-----------|-----------|------------|-----------|-----------|-----------|
| H          | -1.367426 | -1.900033 | 3.774188  | <b>TS4</b> |           |           |           |
| H          | 0.186193  | -2.086948 | 3.339282  | C          | -3.413856 | -1.545524 | -2.567881 |
| H          | -0.509976 | 4.099165  | 1.659039  | C          | -2.749923 | -0.880039 | -1.540642 |
| H          | -2.128143 | 4.423107  | 1.002190  | C          | -2.800122 | 0.513790  | -1.391109 |
|            |           |           |           | C          | -3.588408 | 1.237646  | -2.294475 |
| <b>TS3</b> |           |           |           | C          | -4.270052 | 0.587947  | -3.324719 |
| C          | -2.676571 | 0.920202  | 2.294432  | C          | -4.175810 | -0.798059 | -3.467794 |
| C          | -2.195182 | -0.363328 | 2.069060  | H          | -3.351393 | -2.622864 | -2.649916 |
| C          | -1.514816 | -0.701386 | 0.884642  | H          | -3.660722 | 2.313383  | -2.180956 |
| C          | -1.361058 | 0.312894  | -0.074478 | H          | -4.877705 | 1.167593  | -4.014333 |
| C          | -1.827438 | 1.607678  | 0.140943  | H          | -4.703019 | -1.306377 | -4.270261 |
| C          | -2.492381 | 1.911929  | 1.329908  | O          | -2.492981 | 2.367886  | 0.205197  |
| H          | -3.182808 | 1.129012  | 3.231230  | O          | -1.927691 | -1.554355 | -0.629310 |
| H          | -0.862457 | 0.067221  | -1.007997 | C          | -2.286517 | -2.734914 | -0.051089 |
| H          | -1.680754 | 2.370251  | -0.617768 | C          | -1.254587 | -3.146514 | 0.869462  |
| H          | -2.868235 | 2.914671  | 1.510287  | C          | -0.417596 | -3.514777 | 1.664020  |
| C          | -1.045218 | -2.064220 | 0.530730  | O          | -3.308242 | -3.345878 | -0.267004 |
| H          | -0.630725 | -2.092147 | -0.476671 | C          | 0.585371  | -3.958130 | 2.623588  |
| O          | -2.304458 | -1.256408 | 3.138597  | H          | 0.938083  | -4.966917 | 2.378490  |
| C          | -3.141503 | -2.329650 | 3.074740  | H          | 1.449219  | -3.283631 | 2.636710  |
| C          | -2.902887 | -3.203224 | 4.175040  | H          | 0.161483  | -3.988698 | 3.634306  |
| C          | -2.470936 | -3.994489 | 4.985144  | C          | -2.038740 | 1.206245  | -0.270629 |
| C          | -1.898021 | -4.924194 | 5.941450  | H          | -1.844434 | 0.480665  | 0.533985  |
| H          | -0.825925 | -5.020558 | 5.729592  | P          | -0.187882 | 1.535542  | -0.911662 |
| C          | -0.471878 | -3.022980 | 1.462974  | C          | 0.682670  | 0.143760  | -1.700263 |
| H          | -3.226028 | -2.802088 | 0.575570  | C          | 0.914010  | -1.005160 | -0.925733 |
| C          | -0.408085 | -4.372040 | 0.973068  | C          | 1.125780  | 0.177430  | -3.029675 |
| C          | 0.154144  | -2.675150 | 2.743554  | C          | 1.558054  | -2.108057 | -1.479508 |
| C          | 0.391564  | -5.464409 | 1.637472  | H          | 0.585172  | -1.041359 | 0.106753  |
| H          | 0.557074  | -6.253282 | 0.898845  | C          | 1.774083  | -0.930658 | -3.580472 |
| H          | 1.337167  | -5.106597 | 2.049727  | H          | 0.982116  | 1.067091  | -3.631873 |
| H          | -0.176912 | -5.877961 | 2.477570  | C          | 1.986535  | -2.075465 | -2.810358 |
| O          | -3.947663 | -2.506580 | 2.175928  | H          | 1.716199  | -2.995185 | -0.873009 |
| O          | -2.570602 | -2.773391 | -0.159897 | H          | 2.115512  | -0.893741 | -4.611193 |
| O          | -1.050155 | -4.703629 | -0.075258 | H          | 2.487138  | -2.937568 | -3.242555 |
| O          | 0.352804  | -3.523747 | 3.621391  | C          | -0.249374 | 2.928905  | -2.056823 |
| H          | -2.104517 | -3.715016 | -0.255125 | C          | 0.205670  | 4.188161  | -1.644624 |
| C          | 0.715591  | -1.277954 | 2.993531  | C          | -0.866192 | 2.779459  | -3.310874 |
| H          | 0.181340  | -0.808718 | 3.825346  | C          | 0.053255  | 5.288210  | -2.487903 |
| H          | 1.756909  | -1.408025 | 3.306811  | H          | 0.630270  | 4.318490  | -0.657154 |
| H          | 0.688375  | -0.612781 | 2.129077  | C          | -1.006561 | 3.882708  | -4.149395 |
| H          | -2.012886 | -4.550298 | 6.965738  | H          | -1.257687 | 1.817201  | -3.622207 |
| H          | -2.366622 | -5.912248 | 5.876495  | C          | -0.548109 | 5.137433  | -3.738226 |
|            |           |           |           | H          | 0.384387  | 6.266524  | -2.153470 |

|            |           |           |           |            |           |           |           |
|------------|-----------|-----------|-----------|------------|-----------|-----------|-----------|
| H          | -1.489308 | 3.764728  | -5.115528 | O          | -1.460608 | -5.600998 | -0.662069 |
| H          | -0.672606 | 5.999693  | -4.387893 | C          | -1.084425 | -1.310812 | -1.680646 |
| C          | 0.809503  | 1.964173  | 0.539507  | O          | -1.572431 | -0.538649 | -2.489479 |
| C          | 0.190485  | 2.479942  | 1.687598  | C          | -1.862611 | -1.529626 | 0.822454  |
| C          | 2.202629  | 1.777324  | 0.508379  | C          | -2.768163 | -2.145705 | 1.830667  |
| C          | 0.971105  | 2.792447  | 2.802539  | H          | -2.211524 | -2.546307 | 2.685831  |
| H          | -0.876273 | 2.673315  | 1.681114  | H          | -3.488251 | -1.410207 | 2.209474  |
| C          | 2.970700  | 2.098529  | 1.625519  | H          | -3.321507 | -2.965470 | 1.360934  |
| H          | 2.681942  | 1.378210  | -0.380332 | P          | -0.658618 | -0.059664 | 2.048239  |
| C          | 2.353431  | 2.603243  | 2.775842  | C          | 0.572660  | 0.648037  | 0.921140  |
| H          | 0.490917  | 3.203980  | 3.685404  | C          | 1.943505  | 0.651674  | 1.220675  |
| H          | 4.047569  | 1.955791  | 1.598625  | C          | 0.128660  | 1.160641  | -0.307862 |
| H          | 2.954301  | 2.855114  | 3.645915  | C          | 2.856605  | 1.171883  | 0.303622  |
| C          | -1.540637 | 7.140812  | 1.783714  | H          | 2.294229  | 0.243678  | 2.163237  |
| H          | -1.553654 | 8.128635  | 1.308721  | C          | 1.048125  | 1.664336  | -1.229537 |
| H          | -0.578917 | 6.978377  | 2.278089  | H          | -0.926580 | 1.153913  | -0.559417 |
| H          | -2.328036 | 7.134547  | 2.549575  | C          | 2.411121  | 1.672602  | -0.924413 |
| C          | -1.800531 | 6.012772  | 0.785742  | H          | 3.916579  | 1.178200  | 0.543496  |
| C          | -2.745464 | 6.299342  | -0.264408 | H          | 0.694331  | 2.030173  | -2.188441 |
| H          | -3.091445 | 7.326245  | -0.334234 | H          | 3.126379  | 2.061263  | -1.644190 |
| C          | -3.245964 | 5.428992  | -1.215286 | C          | -1.413572 | 1.337653  | 2.944868  |
| C          | -4.124896 | 5.974327  | -2.320780 | C          | -2.368375 | 1.055546  | 3.938669  |
| H          | -4.267844 | 7.056019  | -2.250444 | C          | -1.135238 | 2.674694  | 2.623139  |
| H          | -3.667969 | 5.736541  | -3.289318 | C          | -3.016148 | 2.091600  | 4.608872  |
| H          | -5.103098 | 5.478970  | -2.294286 | H          | -2.596291 | 0.024110  | 4.195032  |
| O          | -1.195788 | 4.939295  | 0.925645  | C          | -1.795426 | 3.709262  | 3.290000  |
| O          | -3.065601 | 4.146904  | -1.324167 | H          | -0.401197 | 2.906880  | 1.858502  |
| H          | -2.696528 | 3.387956  | -0.519979 | C          | -2.733839 | 3.422570  | 4.283620  |
|            |           |           |           | H          | -3.745769 | 1.860804  | 5.380213  |
| <b>TS6</b> |           |           |           | H          | -1.570348 | 4.740939  | 3.033675  |
| C          | 1.995195  | -2.256449 | -0.765674 | H          | -3.244712 | 4.229719  | 4.800992  |
| C          | 0.771249  | -2.777489 | -1.184864 | C          | 0.282582  | -1.003999 | 3.289290  |
| C          | 0.330251  | -4.031885 | -0.730454 | C          | 0.703148  | -2.295212 | 2.930351  |
| C          | 1.156335  | -4.764373 | 0.138532  | C          | 0.589725  | -0.505843 | 4.564542  |
| C          | 2.389482  | -4.261345 | 0.540125  | C          | 1.428567  | -3.071729 | 3.832972  |
| C          | 2.803697  | -3.000032 | 0.092371  | H          | 0.467402  | -2.689815 | 1.947276  |
| H          | 2.293030  | -1.275899 | -1.119599 | C          | 1.309483  | -1.290922 | 5.467141  |
| H          | 0.803491  | -5.734264 | 0.476306  | H          | 0.270167  | 0.491529  | 4.849717  |
| H          | 3.027787  | -4.841608 | 1.200416  | C          | 1.729779  | -2.573775 | 5.103804  |
| H          | 3.757747  | -2.592799 | 0.415803  | H          | 1.750510  | -4.066985 | 3.541652  |
| C          | -0.974139 | -4.595101 | -1.155462 | H          | 1.544811  | -0.898184 | 6.452678  |
| H          | -1.493795 | -4.061405 | -1.968409 | H          | 2.287982  | -3.183212 | 5.809225  |
| C          | -1.570226 | -1.598939 | -0.398901 |            |           |           |           |
| O          | 0.041173  | -2.046463 | -2.101287 | <b>TS7</b> |           |           |           |



|   |           |           |           |            |           |           |           |
|---|-----------|-----------|-----------|------------|-----------|-----------|-----------|
| C | -4.641455 | -1.470814 | -1.590129 | H          | 1.913809  | -3.654586 | -3.704482 |
| C | -3.478256 | -1.226729 | -0.860526 | C          | 2.387899  | -2.351094 | 2.595869  |
| C | -3.329183 | -0.061864 | -0.097617 | C          | 2.523260  | -2.393441 | 3.993840  |
| C | -4.400734 | 0.838367  | -0.038307 | C          | 3.408405  | -1.782453 | 1.821148  |
| C | -5.575173 | 0.600587  | -0.750692 | C          | 3.661867  | -1.871880 | 4.604257  |
| C | -5.689232 | -0.550204 | -1.539095 | H          | 1.741619  | -2.836858 | 4.603240  |
| H | -4.715699 | -2.388474 | -2.165191 | C          | 4.547725  | -1.261257 | 2.438049  |
| H | -4.273452 | 1.731995  | 0.565231  | H          | 3.321820  | -1.753037 | 0.740423  |
| H | -6.394727 | 1.312480  | -0.702394 | C          | 4.676342  | -1.303174 | 3.827570  |
| H | -6.598756 | -0.741107 | -2.102430 | H          | 3.756721  | -1.908768 | 5.685741  |
| C | -2.026722 | 0.277057  | 0.547191  | H          | 5.334974  | -0.825960 | 1.829143  |
| H | -1.160471 | 0.016650  | -0.101493 | H          | 5.563436  | -0.896641 | 4.304965  |
| C | -1.547787 | -1.708997 | 1.231663  |            |           |           |           |
| O | -2.506554 | -2.217891 | -0.925173 | <b>TS8</b> |           |           |           |
| O | -1.901031 | 1.175529  | 1.395031  | C          | -5.226145 | -1.654151 | -0.848101 |
| C | -1.855991 | -2.677336 | 0.212402  | C          | -3.884004 | -1.447887 | -0.547816 |
| O | -1.677591 | -3.888285 | 0.293742  | C          | -3.422168 | -0.244598 | -0.009465 |
| C | -0.509925 | -1.754124 | 2.077160  | C          | -4.339768 | 0.769887  | 0.252731  |
| C | -0.367362 | -0.828366 | 3.263015  | C          | -5.696206 | 0.582174  | -0.032209 |
| H | -0.532362 | -1.366167 | 4.207730  | C          | -6.135536 | -0.623778 | -0.588428 |
| H | 0.621591  | -0.360918 | 3.319878  | H          | -5.542645 | -2.604618 | -1.266658 |
| H | -1.117638 | -0.039067 | 3.170246  | H          | -3.964745 | 1.698654  | 0.672432  |
| P | 0.850853  | -2.966605 | 1.837124  | H          | -6.408948 | 1.376772  | 0.171911  |
| C | 0.521417  | -4.542263 | 2.671966  | H          | -7.188026 | -0.769712 | -0.816030 |
| C | 1.579435  | -5.421277 | 2.954955  | C          | -1.926597 | -0.120367 | 0.188575  |
| C | -0.787698 | -4.875836 | 3.040625  | H          | -1.497636 | -0.126381 | -0.845613 |
| C | 1.323176  | -6.634362 | 3.592803  | C          | -1.415402 | -1.488584 | 0.693229  |
| H | 2.598020  | -5.155186 | 2.687483  | O          | -3.001087 | -2.500991 | -0.810670 |
| C | -1.034826 | -6.086994 | 3.688561  | O          | -1.446447 | 0.978607  | 0.832036  |
| H | -1.602057 | -4.201561 | 2.804419  | C          | -1.859052 | -2.647264 | -0.059150 |
| C | 0.015507  | -6.966483 | 3.961128  | O          | -1.332189 | -3.754732 | -0.029943 |
| H | 2.142395  | -7.314867 | 3.807061  | C          | -0.458092 | -1.551931 | 1.678373  |
| H | -2.050906 | -6.344260 | 3.972895  | C          | -0.396138 | -0.475124 | 2.650800  |
| H | -0.182612 | -7.909963 | 4.462324  | H          | -1.247787 | -0.460268 | 3.336351  |
| C | 1.191134  | -3.220999 | 0.080004  | H          | 0.546068  | -0.316047 | 3.171641  |
| C | 1.189404  | -2.101635 | -0.765903 | H          | -0.803858 | 0.492893  | 1.852122  |
| C | 1.444092  | -4.495507 | -0.439753 | P          | 0.842712  | -2.838249 | 1.605875  |
| C | 1.455323  | -2.260350 | -2.126095 | C          | 0.378631  | -4.386925 | 2.425473  |
| H | 0.961578  | -1.116591 | -0.369315 | C          | 1.372121  | -5.326913 | 2.739072  |
| C | 1.710437  | -4.645957 | -1.800085 | C          | -0.952195 | -4.623374 | 2.788057  |
| H | 1.402857  | -5.366580 | 0.205293  | C          | 1.027428  | -6.510367 | 3.391658  |
| C | 1.717723  | -3.531008 | -2.643142 | H          | 2.411083  | -5.129221 | 2.490598  |
| H | 1.441547  | -1.393645 | -2.780411 | C          | -1.288234 | -5.802746 | 3.452953  |
| H | 1.894510  | -5.636937 | -2.204835 | H          | -1.716411 | -3.893695 | 2.547149  |

|            |           |           |           |   |           |           |           |
|------------|-----------|-----------|-----------|---|-----------|-----------|-----------|
| C          | -0.303138 | -6.748317 | 3.748535  | O | -1.230497 | -2.858974 | 1.706097  |
| H          | 1.797211  | -7.239128 | 3.629013  | C | 0.632018  | -0.724113 | 1.433213  |
| H          | -2.321637 | -5.984019 | 3.733410  | C | 1.454494  | 0.335697  | 1.629530  |
| H          | -0.570195 | -7.667937 | 4.261769  | H | 2.517846  | 0.229173  | 1.796784  |
| C          | 1.426278  | -3.083466 | -0.088904 | H | 1.051969  | 1.342929  | 1.647995  |
| C          | 1.529702  | -1.950438 | -0.910045 | H | -2.318383 | 2.030530  | 2.411296  |
| C          | 1.765989  | -4.347279 | -0.584012 | P | 1.378901  | -2.380849 | 1.617345  |
| C          | 1.987643  | -2.087319 | -2.221383 | C | 1.134785  | -3.105256 | 3.256693  |
| H          | 1.239347  | -0.972809 | -0.535297 | C | 1.892808  | -4.227948 | 3.623666  |
| C          | 2.224517  | -4.474533 | -1.894554 | C | 0.263523  | -2.503638 | 4.173316  |
| H          | 1.643185  | -5.229123 | 0.035490  | C | 1.757851  | -4.767119 | 4.902719  |
| C          | 2.337893  | -3.346880 | -2.713145 | H | 2.599668  | -4.668423 | 2.925984  |
| H          | 2.059798  | -1.210345 | -2.858184 | C | 0.155357  | -3.038823 | 5.457572  |
| H          | 2.478168  | -5.457256 | -2.281637 | H | -0.338648 | -1.638246 | 3.910428  |
| H          | 2.687349  | -3.452065 | -3.736400 | C | 0.889944  | -4.169596 | 5.821708  |
| C          | 2.263378  | -2.234892 | 2.568527  | H | 2.337811  | -5.641984 | 5.182832  |
| C          | 2.193358  | -2.268487 | 3.971394  | H | -0.517176 | -2.566984 | 6.167247  |
| C          | 3.399060  | -1.701182 | 1.944465  | H | 0.791575  | -4.583438 | 6.821667  |
| C          | 3.246302  | -1.769577 | 4.736502  | C | 0.955784  | -3.440539 | 0.212466  |
| H          | 1.320148  | -2.686809 | 4.462150  | C | 0.810833  | -2.838637 | -1.044788 |
| C          | 4.451901  | -1.205510 | 2.715849  | C | 0.788958  | -4.821965 | 0.356800  |
| H          | 3.467086  | -1.676300 | 0.862429  | C | 0.509645  | -3.625369 | -2.157987 |
| C          | 4.376801  | -1.236978 | 4.110011  | H | 0.910935  | -1.762375 | -1.150222 |
| H          | 3.183190  | -1.796270 | 5.820544  | C | 0.494090  | -5.601362 | -0.760821 |
| H          | 5.330329  | -0.796877 | 2.224644  | H | 0.851987  | -5.281342 | 1.337141  |
| H          | 5.197180  | -0.849633 | 4.707712  | C | 0.356418  | -5.006350 | -2.018472 |
|            |           |           |           | H | 0.386786  | -3.155800 | -3.129832 |
|            |           |           |           | H | 0.354776  | -6.672493 | -0.646118 |
| <b>TS9</b> |           |           |           | H | 0.117883  | -5.616754 | -2.884912 |
| C          | -4.805160 | -0.602592 | -0.015498 | C | 3.195920  | -2.170228 | 1.529926  |
| C          | -3.476209 | -0.542642 | 0.405808  | C | 3.898124  | -1.779593 | 2.682619  |
| C          | -2.714975 | 0.622176  | 0.252157  | C | 3.897044  | -2.367955 | 0.332278  |
| C          | -3.314305 | 1.740157  | -0.349778 | C | 5.277066  | -1.579043 | 2.631318  |
| C          | -4.634618 | 1.694437  | -0.779219 | H | 3.367457  | -1.635482 | 3.618386  |
| C          | -5.380058 | 0.518912  | -0.604657 | C | 5.278569  | -2.171279 | 0.286708  |
| H          | -5.362309 | -1.521631 | 0.133325  | H | 3.371841  | -2.683589 | -0.562363 |
| H          | -2.735047 | 2.654354  | -0.448131 | C | 5.969957  | -1.774332 | 1.433233  |
| H          | -5.090922 | 2.569110  | -1.232543 | H | 5.809184  | -1.274243 | 3.527924  |
| H          | -6.416413 | 0.479919  | -0.928665 | H | 5.812759  | -2.332598 | -0.645364 |
| C          | -1.338842 | 0.637196  | 0.751016  | H | 7.045109  | -1.622594 | 1.395637  |
| H          | -0.679200 | 1.356041  | 0.272590  | C | -6.042966 | 1.892767  | 2.987673  |
| C          | -0.777637 | -0.628580 | 1.090895  | H | -6.768004 | 1.133292  | 3.293754  |
| O          | -2.950978 | -1.677550 | 0.960043  | H | -6.209269 | 2.144708  | 1.934033  |
| O          | -1.374830 | 1.630181  | 2.283702  | H | -6.210538 | 2.805718  | 3.570967  |
| C          | -1.613099 | -1.761697 | 1.284322  |   |           |           |           |

|             |           |           |           |             |           |           |           |
|-------------|-----------|-----------|-----------|-------------|-----------|-----------|-----------|
| C           | -4.594472 | 1.453140  | 3.162505  | H           | 2.135391  | -7.238744 | 3.258285  |
| C           | -4.382795 | 0.142331  | 3.665430  | H           | -1.914759 | -6.000577 | 4.042619  |
| H           | -5.295449 | -0.421393 | 3.825983  | H           | -0.094885 | -7.682826 | 4.268335  |
| C           | -3.208088 | -0.545490 | 4.044096  | C           | 1.273937  | -3.045889 | -0.269724 |
| C           | -3.386831 | -1.955091 | 4.592045  | C           | 1.324012  | -1.910439 | -1.091218 |
| H           | -4.434114 | -2.262916 | 4.654531  | C           | 1.528027  | -4.312151 | -0.808339 |
| H           | -2.846855 | -2.659570 | 3.948900  | C           | 1.645930  | -2.043515 | -2.442769 |
| H           | -2.940222 | -2.012452 | 5.591978  | H           | 1.095599  | -0.932085 | -0.678216 |
| O           | -3.734826 | 2.321427  | 2.831563  | C           | 1.851721  | -4.437862 | -2.159083 |
| O           | -2.000287 | -0.143614 | 3.991325  | H           | 1.442793  | -5.197549 | -0.188247 |
| H           | -1.482956 | 0.916947  | 3.015109  | C           | 1.914527  | -3.305975 | -2.976761 |
| <b>TS10</b> |           |           |           | H           | 1.677335  | -1.162047 | -3.076858 |
| C           | -4.916631 | -1.372876 | -1.643973 | H           | 2.040010  | -5.422958 | -2.576355 |
| C           | -3.782693 | -1.334879 | -0.836770 | H           | 2.159741  | -3.409551 | -4.030041 |
| C           | -3.373048 | -0.164542 | -0.176774 | C           | 2.414939  | -2.268998 | 2.300018  |
| C           | -4.152543 | 1.001020  | -0.336357 | C           | 2.533341  | -2.407300 | 3.692332  |
| C           | -5.286869 | 0.977431  | -1.135882 | C           | 3.461274  | -1.685617 | 1.573846  |
| C           | -5.666443 | -0.207361 | -1.790742 | C           | 3.677394  | -1.955973 | 4.348219  |
| H           | -5.193838 | -2.300445 | -2.134326 | H           | 1.729370  | -2.860041 | 4.264024  |
| H           | -3.848375 | 1.903119  | 0.187342  | C           | 4.609621  | -1.242747 | 2.233546  |
| H           | -5.886416 | 1.875225  | -1.252429 | H           | 3.387127  | -1.580833 | 0.496956  |
| H           | -6.555575 | -0.220470 | -2.414520 | C           | 4.718292  | -1.373623 | 3.619673  |
| C           | -2.191612 | -0.212132 | 0.626777  | H           | 3.752704  | -2.055955 | 5.426985  |
| H           | -1.893957 | 0.705102  | 1.129118  | H           | 5.417712  | -0.795222 | 1.661975  |
| C           | -1.486733 | -1.376172 | 0.793041  | H           | 5.610462  | -1.023688 | 4.131257  |
| O           | -3.059458 | -2.493287 | -0.693558 | C           | 0.827643  | -0.066906 | 6.113701  |
| O           | -1.916321 | 2.328436  | 2.592950  | H           | 0.771576  | 0.492248  | 7.053564  |
| C           | -1.955765 | -2.579344 | 0.109283  | H           | 1.750258  | 0.243037  | 5.606587  |
| O           | -1.420554 | -3.676177 | 0.212046  | H           | 0.888087  | -1.137494 | 6.334260  |
| C           | -0.305965 | -1.480239 | 1.667059  | C           | -0.373920 | 0.309893  | 5.244500  |
| C           | -0.052226 | -0.511471 | 2.632026  | C           | -1.112174 | -0.783089 | 4.645587  |
| H           | 0.910205  | -0.477629 | 3.123107  | H           | -0.767888 | -1.778913 | 4.912739  |
| H           | -0.574264 | 0.438036  | 2.601614  | C           | -2.492599 | -0.720408 | 4.211663  |
| H           | -2.465384 | 1.734845  | 3.158392  | C           | -3.191752 | -2.058483 | 3.987036  |
| P           | 0.867869  | -2.802583 | 1.482616  | H           | -3.060842 | -2.348730 | 2.935996  |
| C           | 0.530058  | -4.384720 | 2.318743  | H           | -2.797077 | -2.862136 | 4.616711  |
| C           | 1.564017  | -5.322621 | 2.464013  | H           | -4.263874 | -1.937916 | 4.163160  |
| C           | -0.720241 | -4.632909 | 2.891931  | O           | -0.592794 | 1.513390  | 5.044616  |
| C           | 1.334161  | -6.512467 | 3.154728  | O           | -3.142434 | 0.313041  | 3.977838  |
| H           | 2.550314  | -5.119401 | 2.056448  | H           | -1.244732 | 2.607174  | 3.238467  |
| C           | -0.941457 | -5.816255 | 3.596993  | <b>TS11</b> |           |           |           |
| H           | -1.513977 | -3.906558 | 2.784808  | C           | -6.231189 | -0.370895 | -1.672882 |
| C           | 0.080963  | -6.759652 | 3.723159  | C           | -4.852114 | -0.304267 | -1.495809 |

|   |           |           |           |             |            |           |           |
|---|-----------|-----------|-----------|-------------|------------|-----------|-----------|
| C | -4.265228 | 0.714082  | -0.739276 | C           | -1.162177  | 3.591067  | -5.170599 |
| C | -5.074087 | 1.681531  | -0.151224 | C           | 1.618542   | 3.732995  | -5.400093 |
| C | -6.460526 | 1.631819  | -0.321812 | H           | 1.675059   | 3.077859  | -3.355061 |
| C | -7.035395 | 0.607026  | -1.079048 | C           | -0.578240  | 4.000910  | -6.371027 |
| H | -6.654090 | -1.177207 | -2.263915 | H           | -2.242261  | 3.554657  | -5.091322 |
| H | -4.604916 | 2.472650  | 0.423807  | C           | 0.810912   | 4.069016  | -6.490218 |
| H | -7.089729 | 2.391166  | 0.134243  | H           | 2.700283   | 3.787999  | -5.482389 |
| H | -8.113279 | 0.564199  | -1.210454 | H           | -1.213209  | 4.269346  | -7.210627 |
| C | -2.768520 | 0.634222  | -0.626105 | H           | 1.262948   | 4.387816  | -7.425292 |
| O | -2.175023 | 1.822702  | -0.142015 | H           | -2.537453  | -0.175105 | 0.088341  |
| C | -2.185668 | 0.182342  | -1.953593 | C           | -0.812557  | -1.160781 | 2.928596  |
| O | -4.075265 | -1.300155 | -2.067989 | H           | -1.777051  | -0.690004 | 3.150519  |
| C | -2.750679 | -1.057050 | -2.460129 | H           | -0.100514  | -0.806011 | 3.683871  |
| O | -2.248548 | -1.884729 | -3.199231 | H           | -0.909311  | -2.246730 | 3.016936  |
| C | -0.162045 | 0.209407  | -3.437063 | C           | -0.333033  | -0.707003 | 1.555542  |
| H | -0.409089 | -0.788123 | -3.796849 | C           | 0.015806   | -1.728296 | 0.614668  |
| H | 0.383700  | 0.819761  | -4.149899 | H           | -0.178078  | -2.750948 | 0.920542  |
| H | 0.630646  | -0.177378 | -2.283142 | C           | 0.537537   | -1.563267 | -0.664115 |
| C | -1.162699 | 0.825610  | -2.628578 | C           | 0.655756   | -2.755485 | -1.581804 |
| P | -1.068887 | 2.664378  | -2.487692 | H           | 0.493463   | -3.697564 | -1.051729 |
| C | -2.754760 | 3.338060  | -2.440590 | H           | -0.101138  | -2.677673 | -2.372515 |
| C | -3.086181 | 4.423366  | -1.622075 | H           | 1.642622   | -2.768350 | -2.057766 |
| C | -3.735662 | 2.755325  | -3.257610 | O           | -0.292705  | 0.529087  | 1.342984  |
| C | -4.382186 | 4.938583  | -1.643689 | O           | 0.946613   | -0.418557 | -1.133747 |
| H | -2.351271 | 4.842111  | -0.944665 | H           | -1.447114  | 1.528865  | 0.458618  |
| C | -5.029964 | 3.273127  | -3.271661 |             |            |           |           |
| H | -3.501049 | 1.881283  | -3.855878 | <b>TS12</b> |            |           |           |
| C | -5.353320 | 4.368781  | -2.470126 | C           | -10.682333 | -0.204960 | -0.930476 |
| H | -4.636370 | 5.774152  | -0.997595 | C           | -9.434712  | -0.400326 | -0.342664 |
| H | -5.788711 | 2.800173  | -3.887537 | C           | -8.909761  | 0.481335  | 0.613087  |
| H | -6.365818 | 4.762169  | -2.471335 | C           | -9.686009  | 1.600102  | 0.978213  |
| C | 0.049674  | 3.433427  | -1.286939 | C           | -10.933229 | 1.809270  | 0.403778  |
| C | 0.226056  | 4.828096  | -1.340451 | C           | -11.431808 | 0.906498  | -0.550687 |
| C | 0.803741  | 2.656625  | -0.404088 | H           | -11.042344 | -0.916924 | -1.666320 |
| C | 1.125396  | 5.443576  | -0.473589 | H           | -9.280954  | 2.299771  | 1.704416  |
| H | -0.319170 | 5.426595  | -2.064499 | H           | -11.522381 | 2.676227  | 0.688292  |
| C | 1.709620  | 3.285462  | 0.455016  | H           | -12.406629 | 1.073746  | -0.999745 |
| H | 0.695357  | 1.578298  | -0.367937 | C           | -7.605114  | 0.214710  | 1.144450  |
| C | 1.866649  | 4.670956  | 0.428902  | H           | -7.222489  | 0.935522  | 1.854368  |
| H | 1.254412  | 6.521768  | -0.508397 | O           | -8.717267  | -1.506502 | -0.717615 |
| H | 2.281566  | 2.676205  | 1.148104  | C           | -7.469051  | -1.771476 | -0.230937 |
| H | 2.569008  | 5.153171  | 1.103529  | O           | -6.938417  | -2.810281 | -0.600383 |
| C | -0.357802 | 3.247189  | -4.076475 | P           | -4.976386  | -2.810894 | 1.354782  |
| C | 1.039738  | 3.328722  | -4.198326 | C           | -6.329473  | -3.812545 | 2.041718  |

|   |           |           |           |             |           |           |           |
|---|-----------|-----------|-----------|-------------|-----------|-----------|-----------|
| C | -6.584583 | -5.122540 | 1.621119  | H           | -1.893277 | 2.613183  | 0.017859  |
| C | -7.151373 | -3.216338 | 3.009467  | H           | -3.466986 | 2.143923  | -0.711606 |
| C | -7.643399 | -5.837784 | 2.181315  | H           | -3.405662 | 3.477713  | 0.436624  |
| H | -5.975363 | -5.571656 | 0.844268  | O           | -6.156460 | 2.927912  | 2.673404  |
| C | -8.209939 | -3.935358 | 3.566112  | O           | -2.313292 | 1.040223  | 1.982505  |
| H | -6.972576 | -2.190803 | 3.318280  | C           | -5.440592 | -1.083037 | 1.099272  |
| C | -8.455200 | -5.247761 | 3.154262  | H           | -4.488536 | -0.724216 | 0.019294  |
| H | -7.842445 | -6.852294 | 1.847516  | C           | -1.767231 | -0.879764 | -2.104453 |
| H | -8.845832 | -3.466998 | 4.312097  | H           | -1.556640 | -0.762501 | -3.171070 |
| H | -9.283364 | -5.805587 | 3.582606  | H           | -1.623251 | -1.929476 | -1.822450 |
| C | -3.642209 | -2.848821 | 2.603833  | H           | -1.046657 | -0.285785 | -1.529213 |
| C | -2.400101 | -2.286889 | 2.261808  | C           | -3.168005 | -0.448589 | -1.742556 |
| C | -3.826277 | -3.413852 | 3.871223  | C           | -4.037101 | -0.012533 | -2.720056 |
| C | -1.361138 | -2.283882 | 3.189130  | H           | -3.676491 | -0.054755 | -3.743445 |
| H | -2.263374 | -1.825356 | 1.288457  | C           | -5.356058 | 0.549008  | -2.516693 |
| C | -2.775241 | -3.416900 | 4.792830  | C           | -6.157455 | 0.864542  | -3.773531 |
| H | -4.779325 | -3.856497 | 4.140406  | H           | -5.550334 | 1.394258  | -4.517392 |
| C | -1.544530 | -2.851345 | 4.454254  | H           | -6.498252 | -0.070732 | -4.237713 |
| H | -0.413275 | -1.824216 | 2.925700  | H           | -7.030482 | 1.466066  | -3.509821 |
| H | -2.922382 | -3.861629 | 5.773265  | O           | -3.406853 | -0.548319 | -0.460586 |
| H | -0.730774 | -2.848867 | 5.174417  | O           | -5.852209 | 0.784615  | -1.405355 |
| C | -4.192111 | -3.726385 | -0.022985 | H           | -5.299115 | 1.518273  | 0.806034  |
| C | -4.327616 | -3.362986 | -1.366516 |             |           |           |           |
| C | -3.395336 | -4.833364 | 0.314436  | <b>TS13</b> |           |           |           |
| C | -3.670144 | -4.091498 | -2.357027 | C           | -5.537907 | 0.084043  | -0.058372 |
| H | -4.941285 | -2.519850 | -1.643809 | C           | -4.202505 | -0.070816 | 0.312659  |
| C | -2.756119 | -5.572597 | -0.681416 | C           | -3.635463 | 0.673572  | 1.359581  |
| H | -3.261519 | -5.114773 | 1.354285  | C           | -4.452844 | 1.590623  | 2.048094  |
| C | -2.888710 | -5.199223 | -2.020996 | C           | -5.784579 | 1.752867  | 1.692299  |
| H | -3.773346 | -3.786227 | -3.394475 | C           | -6.323838 | 0.999680  | 0.635509  |
| H | -2.147563 | -6.429753 | -0.406956 | H           | -5.932704 | -0.506693 | -0.878439 |
| H | -2.382221 | -5.766244 | -2.797516 | H           | -4.017162 | 2.179207  | 2.851306  |
| C | -6.851255 | -0.844155 | 0.716577  | H           | -6.407207 | 2.466431  | 2.223199  |
| C | -4.952128 | -0.135352 | 2.211217  | H           | -7.364218 | 1.131925  | 0.353040  |
| H | -5.687258 | -0.100447 | 3.030896  | C           | -2.240916 | 0.484624  | 1.644711  |
| H | -4.019768 | -0.474475 | 2.656777  | H           | -1.802800 | 1.098042  | 2.422355  |
| C | -4.689705 | 1.310073  | 1.685977  | O           | -3.456743 | -0.986153 | -0.373668 |
| C | -5.118797 | 2.293643  | 2.783515  | C           | -2.115691 | -1.169616 | -0.133137 |
| C | -3.214410 | 1.538871  | 1.328532  | O           | -1.532462 | -2.004180 | -0.801621 |
| C | -4.251161 | 2.405359  | 4.018205  | P           | 0.551090  | -2.305063 | 1.312691  |
| H | -4.815398 | 2.883624  | 4.821654  | C           | -0.888159 | -3.300218 | 1.795950  |
| H | -3.871699 | 1.428445  | 4.333094  | C           | -1.253729 | -4.453391 | 1.092576  |
| H | -3.369101 | 3.015813  | 3.786694  | C           | -1.678450 | -2.855840 | 2.867911  |
| C | -2.965422 | 2.500472  | 0.193342  | C           | -2.391078 | -5.166826 | 1.472259  |

|   |           |           |           |             |           |           |           |
|---|-----------|-----------|-----------|-------------|-----------|-----------|-----------|
| H | -0.671706 | -4.773727 | 0.235911  | O           | 2.090446  | 3.893922  | 1.524539  |
| C | -2.816584 | -3.570424 | 3.241199  | O           | 2.656918  | 0.118859  | 0.168773  |
| H | -1.412129 | -1.951090 | 3.406356  | C           | 0.014158  | -0.533625 | 1.044215  |
| C | -3.172401 | -4.728245 | 2.544183  | H           | 0.392297  | -0.347210 | 0.034806  |
| H | -2.674811 | -6.056916 | 0.918319  | C           | -1.032264 | -0.058199 | -3.550638 |
| H | -3.425801 | -3.218991 | 4.068979  | H           | -1.827007 | 0.330710  | -4.194794 |
| H | -4.062229 | -5.281800 | 2.830606  | H           | -1.322541 | -1.059020 | -3.205626 |
| C | 1.769668  | -2.477290 | 2.658707  | H           | -0.106337 | -0.156486 | -4.125976 |
| C | 3.068346  | -1.983254 | 2.437906  | C           | -0.775281 | 0.810796  | -2.327263 |
| C | 1.466116  | -3.136661 | 3.857385  | C           | -1.814858 | 1.722940  | -1.940858 |
| C | 4.040951  | -2.138232 | 3.423442  | H           | -2.680390 | 1.770027  | -2.593308 |
| H | 3.294804  | -1.457006 | 1.515309  | C           | -1.816406 | 2.612297  | -0.877298 |
| C | 2.450034  | -3.287805 | 4.837947  | C           | -2.969871 | 3.584773  | -0.745396 |
| H | 0.477244  | -3.546324 | 4.027920  | H           | -3.747443 | 3.414726  | -1.494815 |
| C | 3.735347  | -2.787730 | 4.623943  | H           | -3.411279 | 3.506454  | 0.253272  |
| H | 5.039335  | -1.746447 | 3.251694  | H           | -2.588280 | 4.607372  | -0.852992 |
| H | 2.208817  | -3.801980 | 5.764090  | O           | 0.301800  | 0.666530  | -1.718679 |
| H | 4.498791  | -2.906347 | 5.387999  | O           | -0.943959 | 2.756867  | 0.073107  |
| C | 1.372436  | -3.026278 | -0.128994 | H           | 0.052990  | 2.138916  | 0.324144  |
| C | 1.448692  | -2.368634 | -1.361885 |             |           |           |           |
| C | 1.980180  | -4.281974 | 0.045420  | <b>TS14</b> |           |           |           |
| C | 2.120359  | -2.984430 | -2.419328 | C           | -5.138895 | -1.036599 | -0.717824 |
| H | 1.018796  | -1.385512 | -1.512943 | C           | -3.840202 | -0.884943 | -0.222186 |
| C | 2.636689  | -4.891594 | -1.021369 | C           | -3.339730 | 0.385556  | 0.109178  |
| H | 1.950681  | -4.776415 | 1.012634  | C           | -4.175154 | 1.501614  | -0.057689 |
| C | 2.706054  | -4.240792 | -2.257468 | C           | -5.467610 | 1.361252  | -0.553804 |
| H | 2.188819  | -2.466052 | -3.371151 | C           | -5.945189 | 0.086136  | -0.886808 |
| H | 3.101720  | -5.863691 | -0.884009 | H           | -5.489233 | -2.033762 | -0.964831 |
| H | 3.226477  | -4.709819 | -3.088209 | H           | -3.786680 | 2.486841  | 0.182182  |
| C | -1.485281 | -0.386846 | 0.931757  | H           | -6.097012 | 2.235740  | -0.689526 |
| C | 0.718312  | 0.484043  | 1.975235  | H           | -6.951554 | -0.032697 | -1.279355 |
| H | 0.045871  | 0.776058  | 2.781870  | C           | -1.961744 | 0.485245  | 0.599411  |
| H | 1.568723  | 0.009559  | 2.468443  | H           | -1.814263 | 1.302289  | 1.305299  |
| C | 1.209607  | 1.692552  | 1.170302  | O           | -3.106493 | -2.025558 | -0.068979 |
| C | 1.339536  | 2.980545  | 1.877329  | C           | -1.783960 | -1.997866 | 0.408286  |
| C | 2.275811  | 1.303802  | 0.231393  | O           | -1.200669 | -3.081276 | 0.396211  |
| C | 0.443306  | 3.221650  | 3.096006  | P           | 0.762943  | -0.446641 | 2.701436  |
| H | 0.539823  | 4.269860  | 3.387035  | C           | -0.081020 | 0.929327  | 3.517350  |
| H | -0.606637 | 3.007914  | 2.866096  | C           | -1.405670 | 0.731159  | 3.943273  |
| H | 0.745513  | 2.591560  | 3.942795  | C           | 0.510959  | 2.194580  | 3.638810  |
| C | 2.890081  | 2.321514  | -0.698405 | C           | -2.128585 | 1.797064  | 4.476568  |
| H | 3.330230  | 1.792820  | -1.548009 | H           | -1.868985 | -0.243587 | 3.833936  |
| H | 2.151893  | 3.051344  | -1.038238 | C           | -0.214351 | 3.252700  | 4.188244  |
| H | 3.664336  | 2.882561  | -0.163489 | H           | 1.528707  | 2.358423  | 3.300327  |

|   |           |           |           |             |           |           |           |
|---|-----------|-----------|-----------|-------------|-----------|-----------|-----------|
| C | -1.534215 | 3.056398  | 4.601821  | H           | 0.682526  | -1.452646 | 0.524617  |
| H | -3.156977 | 1.643727  | 4.789844  |             |           |           |           |
| H | 0.247856  | 4.231317  | 4.278700  | <b>TS15</b> |           |           |           |
| H | -2.100272 | 3.884189  | 5.019476  | C           | -5.367129 | 0.209143  | 0.074603  |
| C | 2.556414  | -0.149700 | 2.778385  | C           | -4.008576 | -0.014584 | 0.324415  |
| C | 3.348824  | -0.433638 | 1.656492  | C           | -3.062661 | 0.996387  | 0.109820  |
| C | 3.168053  | 0.279600  | 3.967333  | C           | -3.516786 | 2.245086  | -0.331789 |
| C | 4.734788  | -0.276310 | 1.721147  | C           | -4.866009 | 2.481496  | -0.586662 |
| H | 2.894920  | -0.778639 | 0.734119  | C           | -5.793278 | 1.452669  | -0.384526 |
| C | 4.551566  | 0.436858  | 4.026304  | H           | -6.065438 | -0.604195 | 0.245731  |
| H | 2.567103  | 0.494584  | 4.845434  | H           | -2.795289 | 3.042342  | -0.491203 |
| C | 5.336671  | 0.160412  | 2.902442  | H           | -5.191396 | 3.455347  | -0.940661 |
| H | 5.340094  | -0.496674 | 0.846826  | H           | -6.848639 | 1.619666  | -0.581903 |
| H | 5.016732  | 0.772503  | 4.948770  | C           | -1.621837 | 0.732671  | 0.432627  |
| H | 6.414954  | 0.283009  | 2.950223  | H           | -1.343637 | 1.434259  | 1.233093  |
| C | 0.416208  | -1.929022 | 3.677737  | O           | -3.691894 | -1.268648 | 0.788834  |
| C | 0.161988  | -3.159349 | 3.058143  | C           | -2.366356 | -1.655597 | 1.055853  |
| C | 0.478156  | -1.839541 | 5.079836  | O           | -2.230211 | -2.823366 | 1.426170  |
| C | -0.028072 | -4.295546 | 3.849634  | P           | 0.812053  | -0.661937 | 2.924241  |
| H | 0.043499  | -3.232737 | 1.980119  | C           | -0.435334 | 0.439023  | 3.632223  |
| C | 0.292220  | -2.980080 | 5.856816  | C           | -1.716950 | -0.094212 | 3.852763  |
| H | 0.650886  | -0.883100 | 5.564425  | C           | -0.248699 | 1.831965  | 3.693498  |
| C | 0.041995  | -4.211556 | 5.240620  | C           | -2.789218 | 0.754268  | 4.138679  |
| H | -0.245784 | -5.243157 | 3.366026  | H           | -1.882298 | -1.165442 | 3.803134  |
| H | 0.334250  | -2.907388 | 6.939937  | C           | -1.320119 | 2.670602  | 3.994480  |
| H | -0.108885 | -5.099661 | 5.848268  | H           | 0.725566  | 2.264002  | 3.490345  |
| C | -1.294508 | -0.756366 | 0.888884  | C           | -2.595270 | 2.133941  | 4.206244  |
| C | 0.560021  | 0.745415  | 0.164593  | H           | -3.778029 | 0.331360  | 4.289185  |
| H | 0.869189  | 1.534817  | 0.852658  | H           | -1.164018 | 3.744702  | 4.046044  |
| H | 1.408561  | 0.529349  | -0.488281 | H           | -3.433804 | 2.791499  | 4.416944  |
| C | -0.640996 | 1.204344  | -0.660709 | C           | 2.450337  | 0.101958  | 3.163227  |
| C | -0.952625 | 2.647847  | -0.735484 | C           | 3.425311  | -0.118051 | 2.177479  |
| C | -0.831074 | 0.347915  | -1.866327 | C           | 2.785467  | 0.849461  | 4.304927  |
| C | -0.376204 | 3.579233  | 0.327464  | C           | 4.710818  | 0.404827  | 2.326072  |
| H | -0.814187 | 4.569605  | 0.186131  | H           | 3.180904  | -0.698616 | 1.292434  |
| H | -0.600487 | 3.227027  | 1.340830  | C           | 4.070115  | 1.374749  | 4.448368  |
| H | 0.714883  | 3.657260  | 0.244584  | H           | 2.046877  | 1.012405  | 5.083720  |
| C | -1.833772 | 0.688622  | -2.942401 | C           | 5.033488  | 1.155414  | 3.459140  |
| H | -1.906883 | -0.165133 | -3.620667 | H           | 5.456307  | 0.228347  | 1.556046  |
| H | -2.811545 | 0.927153  | -2.515747 | H           | 4.319902  | 1.950112  | 5.335615  |
| H | -1.519184 | 1.583919  | -3.488351 | H           | 6.032673  | 1.566311  | 3.572967  |
| O | -1.723049 | 3.126015  | -1.570716 | C           | 0.853336  | -2.224304 | 3.856428  |
| O | -0.190839 | -0.704638 | -1.932325 | C           | -0.050549 | -3.247544 | 3.527254  |
| C | 0.189365  | -0.575259 | 0.956058  | C           | 1.795503  | -2.427517 | 4.881147  |

|             |           |           |           |   |           |           |           |
|-------------|-----------|-----------|-----------|---|-----------|-----------|-----------|
| C           | -0.022212 | -4.449485 | 4.240070  | O | -1.881913 | -4.164253 | 1.332425  |
| H           | -0.775251 | -3.123493 | 2.724225  | C | -0.194758 | -1.936756 | 1.937509  |
| C           | 1.817665  | -3.633346 | 5.579408  | C | 0.460868  | -0.711536 | 2.558814  |
| H           | 2.511986  | -1.652922 | 5.132292  | H | 1.516378  | -0.902161 | 2.758545  |
| C           | 0.906116  | -4.646211 | 5.263000  | H | 0.434794  | 0.117850  | 1.838996  |
| H           | -0.729097 | -5.232294 | 3.980110  | P | 0.747046  | -3.394669 | 1.744594  |
| H           | 2.548210  | -3.781895 | 6.370047  | C | 0.579415  | -4.733174 | 2.977565  |
| H           | 0.927280  | -5.585829 | 5.808506  | C | 1.530375  | -5.761140 | 3.044302  |
| C           | -1.366379 | -0.683501 | 0.875435  | C | -0.471007 | -4.700019 | 3.897853  |
| C           | 0.694481  | 0.239235  | 0.112729  | C | 1.411082  | -6.764164 | 4.007620  |
| H           | 1.150916  | 0.979779  | 0.775283  | H | 2.374366  | -5.771612 | 2.360375  |
| H           | 1.461301  | -0.122081 | -0.573915 | C | -0.586227 | -5.698990 | 4.862956  |
| C           | -0.484507 | 0.891395  | -0.660825 | H | -1.184320 | -3.885629 | 3.862394  |
| C           | -0.212207 | 2.341925  | -1.051249 | C | 0.349804  | -6.735080 | 4.916109  |
| C           | -0.746945 | 0.062131  | -1.951215 | H | 2.150515  | -7.559157 | 4.053216  |
| C           | 0.292450  | 3.303525  | 0.013145  | H | -1.403211 | -5.664191 | 5.578201  |
| H           | 0.031962  | 4.323220  | -0.280775 | H | 0.259219  | -7.512167 | 5.670442  |
| H           | -0.099923 | 3.086312  | 1.010102  | C | 0.552044  | -4.099767 | 0.066820  |
| H           | 1.386866  | 3.234401  | 0.064091  | C | 0.353215  | -3.211294 | -0.999362 |
| C           | -2.067843 | 0.173546  | -2.670839 | C | 0.604289  | -5.475400 | -0.182235 |
| H           | -2.813087 | -0.446977 | -2.159533 | C | 0.226595  | -3.694317 | -2.302700 |
| H           | -2.442726 | 1.197673  | -2.683390 | H | 0.277818  | -2.145759 | -0.802627 |
| H           | -1.938501 | -0.200280 | -3.689090 | C | 0.478100  | -5.954973 | -1.486597 |
| O           | -0.386129 | 2.734977  | -2.194739 | H | 0.710800  | -6.175374 | 0.638531  |
| O           | 0.129071  | -0.673958 | -2.371562 | C | 0.293226  | -5.067554 | -2.549826 |
| C           | 0.037087  | -0.918300 | 0.906265  | H | 0.066890  | -2.997798 | -3.121403 |
| H           | 0.395547  | -1.929037 | 0.720803  | H | 0.510492  | -7.025609 | -1.669402 |
| <b>TS16</b> |           |           |           | H | 0.189004  | -5.445087 | -3.563393 |
| C           | -5.636714 | -1.740786 | 0.395722  | C | 2.528351  | -2.963306 | 1.840568  |
| C           | -4.290267 | -1.713791 | 0.740277  | C | 3.183979  | -2.949370 | 3.081868  |
| C           | -3.593990 | -0.517940 | 1.003422  | C | 3.242901  | -2.627435 | 0.681648  |
| C           | -4.331684 | 0.686929  | 0.911017  | C | 4.532677  | -2.599354 | 3.156164  |
| C           | -5.678864 | 0.675761  | 0.569118  | H | 2.633148  | -3.181889 | 3.984714  |
| C           | -6.337519 | -0.536673 | 0.308850  | C | 4.592215  | -2.277794 | 0.761748  |
| H           | -6.113730 | -2.696632 | 0.202513  | H | 2.755637  | -2.648560 | -0.286742 |
| H           | -3.821546 | 1.627334  | 1.106786  | C | 5.240126  | -2.262898 | 1.999078  |
| H           | -6.224430 | 1.612961  | 0.502657  | H | 5.028062  | -2.587107 | 4.123190  |
| H           | -7.389916 | -0.542723 | 0.042039  | H | 5.135811  | -2.024254 | -0.144381 |
| C           | -2.209808 | -0.594084 | 1.350790  | H | 6.291234  | -1.993487 | 2.060713  |
| H           | -1.687146 | 0.338452  | 1.524956  | C | -0.309779 | -0.699597 | 6.436834  |
| C           | -1.535827 | -1.808419 | 1.480907  | H | -0.405563 | 0.378523  | 6.582507  |
| O           | -3.628625 | -2.918473 | 0.824726  | H | 0.403638  | -1.121206 | 7.148819  |
| C           | -2.322321 | -3.034188 | 1.210799  | H | -1.291478 | -1.145568 | 6.639953  |
|             |           |           |           | C | 0.148320  | -1.083610 | 5.037454  |



|             |           |           |           |             |           |           |           |
|-------------|-----------|-----------|-----------|-------------|-----------|-----------|-----------|
| C           | -0.245217 | -0.295210 | 3.855823  | H           | -2.878170 | -6.395695 | 3.895972  |
| H           | -1.726811 | -0.867950 | 3.999809  | H           | -1.276465 | -8.298749 | 3.930022  |
| C           | -0.701044 | 1.064453  | 4.006061  | C           | 1.181350  | -3.271207 | 0.375516  |
| C           | -0.100365 | 2.195348  | 3.201720  | C           | 1.678287  | -2.065964 | -0.143472 |
| H           | 0.970424  | 2.060235  | 3.027970  | C           | 1.242367  | -4.438936 | -0.392617 |
| H           | -0.592939 | 2.266530  | 2.222266  | C           | 2.253023  | -2.036743 | -1.414470 |
| H           | -0.284671 | 3.134235  | 3.730210  | H           | 1.613848  | -1.152103 | 0.441088  |
| O           | 0.857410  | -2.087895 | 4.903583  | C           | 1.821626  | -4.405277 | -1.661543 |
| O           | -1.678968 | 1.371956  | 4.764962  | H           | 0.812410  | -5.360252 | -0.016394 |
| O           | -2.797811 | -0.767825 | 4.386965  | C           | 2.330257  | -3.208187 | -2.172681 |
| H           | -2.541425 | 0.230242  | 4.732753  | H           | 2.635010  | -1.100547 | -1.811674 |
| H           | -3.339757 | -0.670515 | 3.577183  | H           | 1.861672  | -5.312964 | -2.257047 |
|             |           |           |           | H           | 2.775542  | -3.185551 | -3.163431 |
| <b>TS17</b> |           |           |           | C           | 1.802388  | -2.915436 | 3.192816  |
| C           | -5.168501 | -1.386936 | -1.242699 | C           | 1.496220  | -2.781800 | 4.558458  |
| C           | -4.094415 | -1.451040 | -0.358319 | C           | 3.138184  | -2.891723 | 2.774241  |
| C           | -3.807631 | -0.419834 | 0.550614  | C           | 2.520933  | -2.604338 | 5.485084  |
| C           | -4.652786 | 0.709108  | 0.554636  | H           | 0.463144  | -2.801568 | 4.893678  |
| C           | -5.728984 | 0.788374  | -0.319479 | C           | 4.161237  | -2.719750 | 3.711093  |
| C           | -5.986457 | -0.259412 | -1.219414 | H           | 3.385402  | -3.002690 | 1.723982  |
| H           | -5.346087 | -2.211556 | -1.925487 | C           | 3.854779  | -2.572108 | 5.064494  |
| H           | -4.447035 | 1.513975  | 1.255361  | H           | 2.275968  | -2.487630 | 6.536838  |
| H           | -6.373766 | 1.662079  | -0.306898 | H           | 5.195376  | -2.699597 | 3.378427  |
| H           | -6.828653 | -0.194677 | -1.902026 | H           | 4.650671  | -2.432210 | 5.790780  |
| C           | -2.676041 | -0.575643 | 1.417635  | C           | 0.546069  | 2.197110  | 3.347970  |
| H           | -2.468481 | 0.210882  | 2.136851  | H           | 1.477509  | 1.638476  | 3.192587  |
| C           | -1.885623 | -1.694799 | 1.383244  | H           | 0.775147  | 3.173620  | 3.779605  |
| O           | -3.304858 | -2.572748 | -0.396058 | H           | 0.091747  | 2.348322  | 2.359397  |
| C           | -2.234369 | -2.754383 | 0.436372  | C           | -0.414557 | 1.468599  | 4.292156  |
| O           | -1.617863 | -3.804901 | 0.330879  | C           | -0.716264 | 0.073490  | 4.003243  |
| C           | -0.740952 | -1.879111 | 2.301744  | C           | -1.492254 | -0.695685 | 4.871653  |
| C           | -0.095248 | -0.537209 | 2.747064  | C           | -2.102737 | -0.177192 | 6.148647  |
| H           | 0.981477  | -0.665802 | 2.902645  | H           | -2.826497 | 0.618256  | 5.944973  |
| H           | -0.183990 | 0.162818  | 1.905345  | H           | -2.595920 | -1.011764 | 6.654907  |
| P           | 0.423631  | -3.206158 | 2.027494  | H           | -1.347107 | 0.274993  | 6.797460  |
| C           | -0.164367 | -4.837693 | 2.570537  | O           | -0.879575 | 2.109237  | 5.247076  |
| C           | 0.748920  | -5.900740 | 2.618328  | O           | -1.747090 | -1.962850 | 4.638055  |
| C           | -1.470609 | -5.018692 | 3.037091  | H           | -1.283460 | -2.164518 | 3.485278  |
| C           | 0.345174  | -7.147733 | 3.095013  |             |           |           |           |
| H           | 1.777144  | -5.753930 | 2.299475  | <b>TS18</b> |           |           |           |
| C           | -1.864765 | -6.263208 | 3.528566  | C           | -5.140181 | -1.654869 | 1.087512  |
| H           | -2.175447 | -4.195968 | 3.033291  | C           | -3.915033 | -1.114901 | 0.700976  |
| C           | -0.963588 | -7.330180 | 3.549938  | C           | -3.789678 | -0.284467 | -0.423669 |
| H           | 1.055094  | -7.969586 | 3.122969  | C           | -4.948526 | 0.007876  | -1.170251 |

|   |           |           |           |             |           |           |           |
|---|-----------|-----------|-----------|-------------|-----------|-----------|-----------|
| C | -6.176442 | -0.524144 | -0.798449 | C           | 3.757778  | -0.709509 | -3.424088 |
| C | -6.270339 | -1.356090 | 0.329838  | H           | 2.196423  | -1.934850 | -2.599764 |
| H | -5.188583 | -2.290118 | 1.965928  | C           | 4.523026  | 0.448709  | -3.277039 |
| H | -4.863306 | 0.667402  | -2.029661 | H           | 4.891736  | 2.200514  | -2.065795 |
| H | -7.066105 | -0.291349 | -1.375777 | H           | 3.924097  | -1.372997 | -4.268200 |
| H | -7.232131 | -1.768789 | 0.620248  | H           | 5.285714  | 0.693402  | -4.011339 |
| C | -2.491954 | 0.245479  | -0.733932 | C           | -2.579469 | 3.253203  | 0.680515  |
| H | -2.422702 | 0.895808  | -1.596742 | H           | -1.935822 | 2.852449  | 1.466048  |
| C | -1.404515 | -0.007769 | 0.047241  | H           | -3.520107 | 2.700872  | 0.594544  |
| O | -2.815279 | -1.422388 | 1.456153  | H           | -2.841901 | 4.288230  | 0.938029  |
| C | -1.566804 | -0.916914 | 1.188026  | C           | -1.903733 | 3.265406  | -0.671439 |
| O | -0.650249 | -1.285891 | 1.899686  | C           | -0.385841 | 3.116277  | -0.852379 |
| C | -0.063004 | 0.640805  | -0.108242 | H           | -0.192519 | 3.706408  | -1.761434 |
| C | 0.028166  | 1.672135  | -1.250979 | C           | 0.607958  | 3.709757  | 0.171242  |
| H | 1.057699  | 1.769485  | -1.584320 | C           | 0.218856  | 4.995307  | 0.872040  |
| H | -0.547262 | 1.365897  | -2.132304 | H           | 0.137644  | 5.791817  | 0.116426  |
| P | 1.322969  | -0.569356 | -0.096937 | H           | -0.727817 | 4.917665  | 1.403633  |
| C | 2.322235  | -0.595460 | 1.422088  | H           | 1.009276  | 5.268012  | 1.575369  |
| C | 3.608148  | -1.158508 | 1.342171  | O           | -2.577780 | 3.365049  | -1.692659 |
| C | 1.857521  | -0.085830 | 2.641012  | O           | 1.802024  | 3.408685  | 0.050768  |
| C | 4.416251  | -1.221523 | 2.475974  | O           | 0.004983  | 2.384394  | 1.875572  |
| H | 3.982003  | -1.539468 | 0.396678  | H           | 0.092176  | 1.322744  | 0.900975  |
| C | 2.681747  | -0.136649 | 3.766698  | H           | 0.881020  | 2.541209  | 2.261689  |
| H | 0.870636  | 0.352102  | 2.710264  |             |           |           |           |
| C | 3.954243  | -0.705711 | 3.690418  | <b>TS19</b> |           |           |           |
| H | 5.407137  | -1.661449 | 2.406803  | C           | 5.550271  | -0.826890 | 0.745241  |
| H | 2.319598  | 0.270334  | 4.706439  | C           | 4.157434  | -0.899336 | 0.710641  |
| H | 4.587712  | -0.744348 | 4.572587  | C           | 3.480201  | -1.571925 | -0.320442 |
| C | 0.734137  | -2.245776 | -0.472447 | C           | 4.240289  | -2.179465 | -1.338004 |
| C | -0.126385 | -2.419918 | -1.567067 | C           | 5.626570  | -2.111932 | -1.317626 |
| C | 1.092234  | -3.344759 | 0.316044  | C           | 6.279105  | -1.434603 | -0.273374 |
| C | -0.614423 | -3.689947 | -1.876088 | H           | 6.033719  | -0.300734 | 1.561894  |
| H | -0.420301 | -1.567454 | -2.172082 | H           | 3.721512  | -2.695916 | -2.141378 |
| C | 0.603803  | -4.613026 | 0.001046  | H           | 6.206814  | -2.582434 | -2.105564 |
| H | 1.724893  | -3.205322 | 1.185675  | H           | 7.364025  | -1.384186 | -0.256189 |
| C | -0.248251 | -4.787683 | -1.092776 | C           | 2.045943  | -1.566532 | -0.289613 |
| H | -1.283733 | -3.818380 | -2.721970 | H           | 1.516758  | -2.068563 | -1.093875 |
| H | 0.877574  | -5.462353 | 0.620344  | C           | 1.354133  | -0.917959 | 0.681651  |
| H | -0.633631 | -5.775557 | -1.329285 | O           | 3.466944  | -0.290845 | 1.718652  |
| C | 2.556720  | -0.179695 | -1.386928 | C           | 2.081630  | -0.234347 | 1.754896  |
| C | 3.333464  | 0.982427  | -1.235778 | O           | 1.573803  | 0.388877  | 2.663322  |
| C | 2.775424  | -1.025934 | -2.482224 | C           | -0.148991 | -0.823039 | 0.711482  |
| C | 4.306828  | 1.292995  | -2.183438 | C           | -0.813925 | -2.098725 | 0.127885  |
| H | 3.152666  | 1.661887  | -0.408903 | H           | -0.774404 | -2.117870 | -0.961009 |

|   |           |           |           |             |           |           |           |
|---|-----------|-----------|-----------|-------------|-----------|-----------|-----------|
| H | -0.188922 | -2.926888 | 0.475901  | H           | -4.307683 | -2.382090 | 2.627249  |
| P | -0.723908 | 0.826812  | -0.073537 | H           | -4.049938 | -4.090049 | 2.244715  |
| C | -0.721013 | 2.267350  | 1.045818  | H           | -3.364085 | -3.410105 | 3.738848  |
| C | -0.475487 | 3.540127  | 0.504830  | O           | -2.750817 | -3.061790 | -1.599953 |
| C | -0.941207 | 2.130651  | 2.421528  | O           | -1.238067 | -2.910193 | 2.648936  |
| C | -0.468409 | 4.665364  | 1.329192  | O           | -2.574662 | 0.180697  | 1.184357  |
| H | -0.282497 | 3.655632  | -0.557024 | H           | -0.459200 | -0.711713 | 1.750227  |
| C | -0.906324 | 3.256176  | 3.244634  | H           | -3.375064 | 0.621424  | 0.858587  |
| H | -1.143836 | 1.156629  | 2.842110  |             |           |           |           |
| C | -0.678224 | 4.523218  | 2.703138  | <b>TS20</b> |           |           |           |
| H | -0.288901 | 5.646360  | 0.898089  | C           | -5.106031 | -1.536966 | -2.438744 |
| H | -1.059606 | 3.137809  | 4.313271  | C           | -3.783479 | -1.108480 | -2.452874 |
| H | -0.659830 | 5.396830  | 3.349246  | C           | -3.298261 | -0.177292 | -1.535816 |
| C | 0.757868  | 1.219722  | -1.138035 | C           | -4.171842 | 0.358626  | -0.591895 |
| C | 0.839648  | 0.758739  | -2.458432 | C           | -5.506003 | -0.054355 | -0.560643 |
| C | 1.898803  | 1.812825  | -0.568324 | C           | -5.969601 | -1.002457 | -1.478178 |
| C | 2.030669  | 0.867173  | -3.183786 | H           | -5.441707 | -2.267510 | -3.167850 |
| H | -0.023404 | 0.311337  | -2.937368 | H           | -3.795514 | 1.104581  | 0.101015  |
| C | 3.086429  | 1.920894  | -1.289780 | H           | -6.183866 | 0.366506  | 0.176464  |
| H | 1.867537  | 2.181070  | 0.451418  | H           | -7.006368 | -1.326078 | -1.453118 |
| C | 3.159792  | 1.440544  | -2.600165 | C           | -1.834934 | 0.210378  | -1.642626 |
| H | 2.069825  | 0.500087  | -4.205956 | O           | -1.530813 | 1.449332  | -1.114049 |
| H | 3.957382  | 2.371568  | -0.822099 | C           | -1.515077 | 0.253657  | -3.112170 |
| H | 4.088982  | 1.513562  | -3.158253 | O           | -2.940142 | -1.666601 | -3.421752 |
| C | -2.067743 | 0.942897  | -1.317295 | C           | -1.811362 | -1.014977 | -3.843091 |
| C | -2.344029 | -0.088435 | -2.222397 | O           | -1.154008 | -1.498303 | -4.734278 |
| C | -2.839497 | 2.115905  | -1.359807 | C           | -0.791400 | 1.520625  | -5.171888 |
| C | -3.378520 | 0.047255  | -3.150602 | H           | -0.944365 | 0.566506  | -5.675918 |
| H | -1.802987 | -1.023461 | -2.196903 | H           | -1.397647 | 2.293832  | -5.653640 |
| C | -3.862554 | 2.250404  | -2.298696 | H           | 0.255091  | 1.809348  | -5.316670 |
| H | -2.659975 | 2.917553  | -0.652605 | C           | -1.112052 | 1.392121  | -3.704701 |
| C | -4.136811 | 1.217088  | -3.198643 | P           | -1.121401 | 2.938346  | -2.671577 |
| H | -3.589927 | -0.779483 | -3.822221 | C           | -2.796270 | 3.424244  | -2.144838 |
| H | -4.450797 | 3.163933  | -2.317508 | C           | -2.995998 | 4.113621  | -0.943998 |
| H | -4.940281 | 1.320781  | -3.922557 | C           | -3.891916 | 3.046312  | -2.929615 |
| C | -4.644925 | -3.012765 | -0.190785 | C           | -4.292525 | 4.436757  | -0.543382 |
| H | -4.857034 | -4.031147 | 0.155558  | H           | -2.155303 | 4.349918  | -0.300891 |
| H | -5.168283 | -2.870825 | -1.139913 | C           | -5.186424 | 3.366912  | -2.518889 |
| H | -5.033481 | -2.313867 | 0.553772  | H           | -3.743354 | 2.481028  | -3.845287 |
| C | -3.154824 | -2.838796 | -0.452450 | C           | -5.388757 | 4.066843  | -1.327918 |
| C | -2.248848 | -2.320095 | 0.599388  | H           | -4.445306 | 4.960593  | 0.396052  |
| H | -2.637356 | -1.086858 | 0.857680  | H           | -6.033633 | 3.055157  | -3.122936 |
| C | -2.282501 | -2.843521 | 1.996947  | H           | -6.396980 | 4.310201  | -1.004515 |
| C | -3.586295 | -3.203725 | 2.689721  | C           | 0.252130  | 3.365774  | -1.551331 |

|             |           |           |           |   |           |           |           |
|-------------|-----------|-----------|-----------|---|-----------|-----------|-----------|
| C           | 0.437277  | 4.714434  | -1.212039 | C | -6.315531 | -1.537316 | 0.085356  |
| C           | 1.120448  | 2.388545  | -1.055481 | H | -6.593670 | -1.441927 | -2.062597 |
| C           | 1.469348  | 5.075200  | -0.346493 | H | -3.706196 | -0.128815 | 1.747897  |
| H           | -0.216200 | 5.479577  | -1.619964 | H | -5.742852 | -1.486036 | 2.172410  |
| C           | 2.169650  | 2.762540  | -0.215240 | H | -7.208406 | -2.132944 | 0.256629  |
| H           | 0.953123  | 1.340095  | -1.267257 | C | -2.823633 | 0.882499  | -0.629227 |
| C           | 2.339875  | 4.099535  | 0.148373  | O | -3.096878 | 2.284572  | -0.226450 |
| H           | 1.596257  | 6.117229  | -0.066354 | C | -2.449425 | 0.876150  | -2.061424 |
| H           | 2.831339  | 1.997366  | 0.177649  | O | -4.559083 | -0.073359 | -2.737133 |
| H           | 3.145477  | 4.382012  | 0.820699  | C | -3.324842 | 0.523100  | -3.093011 |
| C           | -0.765192 | 4.214364  | -3.986504 | O | -3.162343 | 0.678065  | -4.314242 |
| C           | 0.556905  | 4.358438  | -4.442250 | C | -0.030885 | 0.920130  | -2.703334 |
| C           | -1.756576 | 5.031848  | -4.544037 | H | 0.043569  | -0.158942 | -2.595015 |
| C           | 0.874891  | 5.278177  | -5.439065 | H | 0.863318  | 1.449707  | -3.025780 |
| H           | 1.348256  | 3.754855  | -4.006030 | C | -1.202342 | 1.522856  | -2.463816 |
| C           | -1.438687 | 5.959912  | -5.541403 | P | -1.165392 | 3.376977  | -2.687659 |
| H           | -2.781673 | 4.959377  | -4.199262 | C | -2.816442 | 4.113762  | -2.745285 |
| C           | -0.125477 | 6.082646  | -5.994666 | C | -3.123575 | 5.211051  | -1.927503 |
| H           | 1.903186  | 5.372447  | -5.777292 | C | -3.795293 | 3.574680  | -3.594042 |
| H           | -2.221634 | 6.588237  | -5.957414 | C | -4.395236 | 5.779946  | -1.976327 |
| H           | 0.121234  | 6.804020  | -6.768835 | H | -2.388919 | 5.608712  | -1.237352 |
| H           | -1.213526 | -0.560453 | -1.160529 | C | -5.065734 | 4.149965  | -3.631040 |
| C           | 1.905753  | -1.314128 | 1.737502  | H | -3.590141 | 2.688441  | -4.188944 |
| H           | 2.417851  | -1.068890 | 2.673258  | C | -5.367787 | 5.252163  | -2.829281 |
| H           | 2.643949  | -1.440112 | 0.937749  | H | -4.628530 | 6.626333  | -1.336298 |
| H           | 1.396268  | -2.278141 | 1.860326  | H | -5.822559 | 3.716037  | -4.278025 |
| C           | 0.879886  | -0.264550 | 1.316708  | H | -6.361738 | 5.690659  | -2.857384 |
| C           | 0.560622  | 0.755563  | 2.270436  | C | -0.242714 | 4.159185  | -1.331587 |
| H           | 1.102864  | 0.725384  | 3.209752  | C | 0.208165  | 5.483762  | -1.457280 |
| C           | -0.387425 | 1.768151  | 2.150604  | C | -0.006015 | 3.453108  | -0.145775 |
| C           | -0.555882 | 2.737840  | 3.304476  | C | 0.894314  | 6.091006  | -0.406518 |
| H           | 0.080798  | 2.494223  | 4.159292  | H | 0.028058  | 6.035772  | -2.375041 |
| H           | -0.316367 | 3.751447  | 2.959174  | C | 0.682909  | 4.065753  | 0.902720  |
| H           | -1.604045 | 2.744970  | 3.626256  | H | -0.364572 | 2.436409  | -0.042939 |
| O           | 0.384838  | -0.362368 | 0.175584  | C | 1.133162  | 5.381428  | 0.774709  |
| O           | -1.180712 | 2.019948  | 1.165143  | H | 1.242887  | 7.114597  | -0.510709 |
| H           | -1.238302 | 1.538181  | 0.014591  | H | 0.865451  | 3.513063  | 1.819872  |
|             |           |           |           | H | 1.670124  | 5.854439  | 1.592301  |
|             |           |           |           | C | -0.264233 | 3.792060  | -4.214992 |
| <b>TS21</b> |           |           |           | C | 1.126362  | 3.988662  | -4.189271 |
| C           | -5.984198 | -1.154293 | -1.211410 | C | -0.940462 | 3.799037  | -5.444272 |
| C           | -4.833893 | -0.388643 | -1.441359 | C | 1.825582  | 4.204058  | -5.377071 |
| C           | -4.014764 | 0.006091  | -0.374662 | H | 1.663735  | 3.980429  | -3.246480 |
| C           | -4.355583 | -0.409746 | 0.919365  | C | -0.235253 | 4.015781  | -6.627450 |
| C           | -5.496290 | -1.173008 | 1.161811  |   |           |           |           |

|             |           |           |           |            |           |           |           |
|-------------|-----------|-----------|-----------|------------|-----------|-----------|-----------|
| H           | -2.009754 | 3.627786  | -5.483215 | C          | -2.446117 | 0.125744  | 3.427179  |
| C           | 1.146667  | 4.219955  | -6.597947 | C          | -1.631319 | 2.374456  | 3.008579  |
| H           | 2.900396  | 4.359696  | -5.346140 | C          | -3.538024 | 0.648885  | 4.118311  |
| H           | -0.768536 | 4.018672  | -7.573615 | H          | -2.360208 | -0.947685 | 3.287240  |
| H           | 1.692446  | 4.387323  | -7.522255 | C          | -2.728396 | 2.891476  | 3.696939  |
| H           | -1.985440 | 0.557214  | 0.009708  | H          | -0.920043 | 3.042238  | 2.536452  |
| H           | -3.423682 | 2.281968  | 0.689455  | C          | -3.675668 | 2.031395  | 4.259957  |
|             |           |           |           | H          | -4.290611 | -0.022303 | 4.520733  |
| <b>TS7'</b> |           |           |           | H          | -2.851932 | 3.967605  | 3.777808  |
| C           | -4.969345 | -1.852488 | 0.107067  | H          | -4.531955 | 2.439657  | 4.789835  |
| C           | -3.834946 | -1.202632 | -0.368150 | C          | 1.073567  | -0.296612 | 3.421822  |
| C           | -3.561618 | 0.131985  | -0.028287 | C          | 2.360156  | -0.738598 | 3.072079  |
| C           | -4.453265 | 0.797281  | 0.816462  | C          | 0.676116  | -0.311635 | 4.763963  |
| C           | -5.599985 | 0.161073  | 1.296078  | C          | 3.233345  | -1.197881 | 4.055414  |
| C           | -5.860486 | -1.163108 | 0.936825  | H          | 2.678361  | -0.715910 | 2.033192  |
| H           | -5.141897 | -2.885366 | -0.179500 | C          | 1.556529  | -0.771028 | 5.747438  |
| H           | -4.220562 | 1.822753  | 1.085296  | H          | -0.311823 | 0.038073  | 5.044043  |
| H           | -6.285873 | 0.696860  | 1.946841  | C          | 2.831788  | -1.215748 | 5.395670  |
| H           | -6.752638 | -1.666134 | 1.300521  | H          | 4.226470  | -1.539114 | 3.777654  |
| C           | -2.357551 | 0.864572  | -0.562750 | H          | 1.243373  | -0.776896 | 6.787647  |
| H           | -2.146385 | 0.664137  | -1.628975 | H          | 3.514233  | -1.572609 | 6.161960  |
| C           | -1.175748 | -0.906321 | -0.035363 |            |           |           |           |
| O           | -2.999852 | -1.921985 | -1.215826 | <b>VI'</b> |           |           |           |
| O           | -1.967023 | 1.926534  | -0.041488 | C          | -4.594030 | -1.940028 | 0.283186  |
| C           | -1.620612 | -1.860893 | -1.019912 | C          | -3.694825 | -1.114746 | -0.389558 |
| O           | -0.914565 | -2.491726 | -1.784070 | C          | -3.661311 | 0.268556  | -0.129181 |
| C           | -0.525806 | -1.185963 | 1.097448  | C          | -4.546958 | 0.799690  | 0.816029  |
| C           | -0.198427 | -2.556330 | 1.667415  | C          | -5.457785 | -0.017696 | 1.481114  |
| H           | 0.881764  | -2.735932 | 1.714128  | C          | -5.480850 | -1.389516 | 1.212200  |
| H           | -0.587514 | -2.688278 | 2.685687  | H          | -4.591546 | -3.002605 | 0.060898  |
| H           | -0.638568 | -3.322802 | 1.024326  | H          | -4.500690 | 1.865781  | 1.011924  |
| P           | -0.036260 | 0.253099  | 2.084206  | H          | -6.144774 | 0.409942  | 2.205737  |
| C           | 0.922615  | 1.493459  | 1.180287  | H          | -6.189719 | -2.035256 | 1.724164  |
| C           | 1.674238  | 2.423416  | 1.918872  | C          | -2.725420 | 1.170862  | -0.847094 |
| C           | 0.928848  | 1.535006  | -0.218131 | H          | -2.311972 | 0.786148  | -1.792748 |
| C           | 2.417739  | 3.398058  | 1.256359  | C          | -1.001776 | -0.894041 | -0.075591 |
| H           | 1.686934  | 2.380134  | 3.004288  | O          | -2.881063 | -1.691208 | -1.343574 |
| C           | 1.687333  | 2.505917  | -0.873397 | O          | -2.480776 | 2.313875  | -0.480101 |
| H           | 0.348876  | 0.814330  | -0.780732 | C          | -1.475039 | -1.687400 | -1.156923 |
| C           | 2.424425  | 3.438479  | -0.141870 | O          | -0.811490 | -2.226330 | -2.025338 |
| H           | 2.994812  | 4.118362  | 1.829279  | C          | -0.494223 | -1.273697 | 1.097519  |
| H           | 1.691103  | 2.535747  | -1.958892 | C          | -0.377804 | -2.663012 | 1.701268  |
| H           | 3.007530  | 4.195927  | -0.658634 | H          | 0.663248  | -2.958281 | 1.877257  |
| C           | -1.482084 | 0.988757  | 2.888283  | H          | -0.901081 | -2.747378 | 2.663510  |

|             |           |           |           |   |           |           |           |
|-------------|-----------|-----------|-----------|---|-----------|-----------|-----------|
| H           | -0.820866 | -3.381576 | 1.005540  | H | -4.314508 | 2.323994  | 0.306982  |
| P           | -0.012004 | 0.148157  | 2.098569  | H | -6.763021 | 1.820170  | 0.233977  |
| C           | 0.949338  | 1.422553  | 1.228565  | H | -7.558057 | -0.274516 | -0.852806 |
| C           | 1.804563  | 2.236650  | 1.992455  | C | -2.259729 | 0.761096  | -0.694861 |
| C           | 0.822277  | 1.640830  | -0.149168 | O | -1.861813 | 2.076172  | -0.562160 |
| C           | 2.526701  | 3.257973  | 1.377505  | C | -1.744432 | 0.242799  | -2.015386 |
| H           | 1.911344  | 2.071961  | 3.060143  | O | -3.344952 | -1.546591 | -1.912864 |
| C           | 1.555613  | 2.661096  | -0.756734 | C | -2.105739 | -1.153177 | -2.361109 |
| H           | 0.150725  | 1.011228  | -0.721407 | O | -1.427369 | -1.945910 | -2.971310 |
| C           | 2.403541  | 3.470768  | 0.000903  | C | -0.640855 | 0.847758  | -4.199161 |
| H           | 3.186623  | 3.883157  | 1.972419  | H | -0.817713 | -0.198230 | -4.456919 |
| H           | 1.452255  | 2.824918  | -1.825313 | H | -1.103446 | 1.497629  | -4.948234 |
| H           | 2.967063  | 4.267352  | -0.477410 | H | 0.436528  | 1.033987  | -4.257551 |
| C           | -1.473423 | 0.937882  | 2.827096  | C | -1.158086 | 1.139025  | -2.821297 |
| C           | -2.375761 | 0.143948  | 3.553583  | P | -1.298152 | 2.895418  | -2.126192 |
| C           | -1.704680 | 2.310461  | 2.687869  | C | -2.997371 | 3.559817  | -2.318853 |
| C           | -3.476920 | 0.730146  | 4.171044  | C | -3.431700 | 4.649722  | -1.555886 |
| H           | -2.223645 | -0.928802 | 3.628667  | C | -3.898416 | 2.917703  | -3.177065 |
| C           | -2.816959 | 2.890730  | 3.302176  | C | -4.751573 | 5.093461  | -1.656629 |
| H           | -1.038186 | 2.918961  | 2.087659  | H | -2.749594 | 5.139172  | -0.867884 |
| C           | -3.693311 | 2.107072  | 4.053415  | C | -5.219228 | 3.358549  | -3.270557 |
| H           | -4.173808 | 0.111716  | 4.728909  | H | -3.579281 | 2.060823  | -3.763038 |
| H           | -3.000395 | 3.954170  | 3.179800  | C | -5.649495 | 4.448799  | -2.511862 |
| H           | -4.556672 | 2.562635  | 4.530759  | H | -5.080109 | 5.938802  | -1.057603 |
| C           | 1.052506  | -0.374571 | 3.483263  | H | -5.911902 | 2.841899  | -3.929104 |
| C           | 2.254074  | -1.027320 | 3.161095  | H | -6.678732 | 4.789958  | -2.581194 |
| C           | 0.723351  | -0.152263 | 4.825646  | C | -0.175979 | 3.862239  | -1.010568 |
| C           | 3.110885  | -1.456630 | 4.172050  | C | -0.009511 | 5.237738  | -1.229126 |
| H           | 2.519990  | -1.191053 | 2.119780  | C | 0.539635  | 3.243841  | 0.021955  |
| C           | 1.585726  | -0.584848 | 5.837073  | C | 0.834893  | 5.986876  | -0.408931 |
| H           | -0.196924 | 0.360970  | 5.083648  | H | -0.531008 | 5.726515  | -2.045649 |
| C           | 2.776214  | -1.237429 | 5.512943  | C | 1.420085  | 3.986100  | 0.812198  |
| H           | 4.038049  | -1.961014 | 3.915383  | H | 0.396195  | 2.187190  | 0.211772  |
| H           | 1.325593  | -0.407499 | 6.876853  | C | 1.561468  | 5.360358  | 0.607002  |
| H           | 3.444456  | -1.573354 | 6.300931  | H | 0.936789  | 7.055712  | -0.576286 |
|             |           |           |           | H | 1.984003  | 3.490247  | 1.597738  |
|             |           |           |           | H | 2.234428  | 5.939851  | 1.233342  |
| <b>VII'</b> |           |           |           | C | -0.540984 | 3.712959  | -3.689088 |
| C           | -5.582800 | -0.937523 | -1.385777 | C | 0.851869  | 3.634103  | -3.862707 |
| C           | -4.227007 | -0.631184 | -1.327024 | C | -1.282790 | 4.377972  | -4.672741 |
| C           | -3.760333 | 0.526110  | -0.701980 | C | 1.479882  | 4.181289  | -4.979841 |
| C           | -4.682905 | 1.407908  | -0.142391 | H | 1.461588  | 3.145413  | -3.105008 |
| C           | -6.048785 | 1.123787  | -0.195674 | C | -0.659443 | 4.937198  | -5.795643 |
| C           | -6.495959 | -0.049914 | -0.810694 | H | -2.358391 | 4.474534  | -4.572083 |
| H           | -5.904124 | -1.849060 | -1.879605 |   |           |           |           |

|              |           |           |           |           |           |           |           |
|--------------|-----------|-----------|-----------|-----------|-----------|-----------|-----------|
| C            | 0.722039  | 4.837690  | -5.955911 | C         | 1.546347  | 3.665698  | 0.562329  |
| H            | 2.558866  | 4.102772  | -5.087276 | H         | 0.739836  | 2.000007  | -0.551646 |
| H            | -1.259803 | 5.452751  | -6.541253 | C         | 1.532357  | 5.051859  | 0.741331  |
| H            | 1.206939  | 5.270834  | -6.826730 | H         | 0.705326  | 6.928902  | 0.068556  |
| H            | -1.818403 | 0.165134  | 0.126372  | H         | 2.205747  | 3.043756  | 1.161148  |
|              |           |           |           | H         | 2.174896  | 5.510410  | 1.487658  |
| <b>VIII'</b> |           |           |           | C         | -0.449060 | 3.854535  | -3.990277 |
| C            | -5.897027 | -0.604415 | -1.437360 | C         | 0.924982  | 4.138504  | -4.065189 |
| C            | -4.522331 | -0.375384 | -1.351522 | C         | -1.267812 | 4.118947  | -5.098415 |
| C            | -4.018498 | 0.668334  | -0.566784 | C         | 1.470228  | 4.665775  | -5.236149 |
| C            | -4.903875 | 1.500957  | 0.115190  | H         | 1.568398  | 3.948691  | -3.212177 |
| C            | -6.282594 | 1.288228  | 0.029291  | C         | -0.718674 | 4.653581  | -6.263404 |
| C            | -6.774701 | 0.230264  | -0.741519 | H         | -2.331553 | 3.913643  | -5.052810 |
| H            | -6.255510 | -1.423521 | -2.053138 | C         | 0.650568  | 4.924258  | -6.337184 |
| H            | -4.503930 | 2.323432  | 0.699245  | H         | 2.534877  | 4.876245  | -5.285098 |
| H            | -6.967621 | 1.943172  | 0.561097  | H         | -1.362570 | 4.857788  | -7.114115 |
| H            | -7.845700 | 0.056142  | -0.808822 | H         | 1.075610  | 5.338037  | -7.247337 |
| C            | -2.517383 | 0.796982  | -0.532111 | H         | -2.128579 | 0.097546  | 0.231362  |
| O            | -2.146788 | 2.125106  | -0.101810 | H         | -1.450988 | 2.050444  | 0.565478  |
| C            | -1.942951 | 0.469858  | -1.894721 |           |           |           |           |
| O            | -3.679454 | -1.199732 | -2.047486 | <b>XI</b> |           |           |           |
| C            | -2.456011 | -0.662331 | -2.575657 | C         | -5.249402 | -1.630365 | -3.073915 |
| O            | -2.031878 | -1.241087 | -3.570769 | C         | -3.919818 | -1.225901 | -3.133861 |
| C            | -0.018153 | 0.837716  | -3.460748 | C         | -3.339837 | -0.448097 | -2.131108 |
| H            | 0.130511  | -0.225736 | -3.602295 | C         | -4.125036 | -0.046717 | -1.051942 |
| H            | 0.529431  | 1.513067  | -4.106870 | C         | -5.463771 | -0.435739 | -0.974378 |
| C            | -0.945672 | 1.267700  | -2.557418 | C         | -6.021904 | -1.231225 | -1.980042 |
| P            | -1.129782 | 3.090816  | -2.478039 | H         | -5.660893 | -2.236763 | -3.874549 |
| C            | -2.888173 | 3.515425  | -2.433064 | H         | -3.679967 | 0.587742  | -0.292923 |
| C            | -3.411077 | 4.536362  | -1.632771 | H         | -6.072061 | -0.112943 | -0.134316 |
| C            | -3.745061 | 2.731694  | -3.222383 | H         | -7.062931 | -1.536478 | -1.921253 |
| C            | -4.782993 | 4.786145  | -1.637256 | C         | -1.879108 | -0.070132 | -2.296477 |
| H            | -2.764636 | 5.108536  | -0.977357 | O         | -1.489857 | 1.074535  | -1.627307 |
| C            | -5.116674 | 2.984545  | -3.216960 | C         | -1.666709 | 0.160330  | -3.771012 |
| H            | -3.350284 | 1.907388  | -3.807325 | O         | -3.179051 | -1.646399 | -4.245509 |
| C            | -5.635949 | 4.010415  | -2.426558 | C         | -2.078415 | -0.943680 | -4.672822 |
| H            | -5.187520 | 5.571582  | -1.005047 | O         | -1.542368 | -1.269194 | -5.706507 |
| H            | -5.777827 | 2.355655  | -3.804976 | C         | -1.090711 | 1.841885  | -5.561369 |
| H            | -6.706868 | 4.190791  | -2.407570 | H         | -1.332198 | 1.032395  | -6.252791 |
| C            | -0.131661 | 3.870708  | -1.173078 | H         | -1.701909 | 2.720178  | -5.790902 |
| C            | -0.116021 | 5.263473  | -1.018394 | H         | -0.051518 | 2.138284  | -5.737899 |
| C            | 0.717649  | 3.074660  | -0.392925 | C         | -1.284599 | 1.390853  | -4.143170 |
| C            | 0.704701  | 5.849466  | -0.053321 | P         | -1.257551 | 2.588019  | -2.684440 |
| H            | -0.723301 | 5.892993  | -1.661755 | C         | -2.943420 | 3.093206  | -2.169787 |

|   |           |           |           |             |           |           |           |
|---|-----------|-----------|-----------|-------------|-----------|-----------|-----------|
| C | -3.182056 | 3.590930  | -0.883737 | H           | -1.532219 | 2.701864  | 3.409768  |
| C | -4.019147 | 2.888122  | -3.042290 | O           | -0.245315 | -0.751767 | 0.260449  |
| C | -4.484921 | 3.891641  | -0.483263 | O           | -1.234034 | 1.612523  | 1.067881  |
| H | -2.362166 | 3.705067  | -0.183202 | H           | -1.106894 | 0.923805  | 0.358888  |
| C | -5.321600 | 3.181143  | -2.635000 |             |           |           |           |
| H | -3.848252 | 2.483437  | -4.035764 | <b>XVII</b> |           |           |           |
| C | -5.557880 | 3.687317  | -1.355330 | C           | -5.152986 | -1.470141 | -2.380073 |
| H | -4.662176 | 4.272037  | 0.519411  | C           | -3.854331 | -1.001107 | -2.218155 |
| H | -6.149734 | 3.003724  | -3.315627 | C           | -3.544391 | 0.024577  | -1.325931 |
| H | -6.571976 | 3.911927  | -1.036182 | C           | -4.570404 | 0.607525  | -0.586176 |
| C | 0.122175  | 2.972588  | -1.512722 | C           | -5.883800 | 0.154210  | -0.733256 |
| C | 0.239591  | 4.266224  | -0.988579 | C           | -6.173094 | -0.883027 | -1.625389 |
| C | 1.053687  | 1.994336  | -1.146232 | H           | -5.349275 | -2.276111 | -3.079958 |
| C | 1.251666  | 4.566212  | -0.075335 | H           | -4.322522 | 1.420704  | 0.088104  |
| H | -0.455486 | 5.042420  | -1.292783 | H           | -6.680807 | 0.611420  | -0.153713 |
| C | 2.090983  | 2.308187  | -0.266926 | H           | -7.193327 | -1.238960 | -1.738030 |
| H | 0.945690  | 0.982702  | -1.518146 | C           | -2.091325 | 0.438533  | -1.230192 |
| C | 2.184996  | 3.589395  | 0.281743  | O           | -1.905363 | 1.700802  | -0.675992 |
| H | 1.318917  | 5.567081  | 0.343003  | C           | -1.528458 | 0.376313  | -2.629274 |
| H | 2.811541  | 1.542367  | 0.006191  | O           | -2.849628 | -1.620382 | -2.966666 |
| H | 2.981690  | 3.826244  | 0.982103  | C           | -1.662784 | -0.988702 | -3.238527 |
| C | -0.855961 | 4.128046  | -3.755197 | O           | -0.847552 | -1.556214 | -3.923309 |
| C | 0.461149  | 4.278054  | -4.223911 | C           | -0.410647 | 1.331871  | -4.687399 |
| C | -1.785571 | 5.116395  | -4.101089 | H           | -0.403609 | 0.298503  | -5.029706 |
| C | 0.833617  | 5.358873  | -5.020711 | H           | -0.933864 | 1.959127  | -5.415789 |
| H | 1.215756  | 3.542184  | -3.952910 | H           | 0.629037  | 1.677387  | -4.660017 |
| C | -1.418701 | 6.210032  | -4.895745 | C           | -1.030884 | 1.425189  | -3.312333 |
| H | -2.808823 | 5.049331  | -3.748163 | P           | -1.193298 | 3.130546  | -2.629731 |
| C | -0.110578 | 6.333397  | -5.362217 | C           | -2.921810 | 3.544759  | -2.257613 |
| H | 1.859438  | 5.445929  | -5.370088 | C           | -3.242148 | 4.399992  | -1.198004 |
| H | -2.160657 | 6.964837  | -5.144693 | C           | -3.936069 | 2.989706  | -3.046777 |
| H | 0.175317  | 7.181056  | -5.979390 | C           | -4.577578 | 4.710270  | -0.943829 |
| H | -1.256163 | -0.912471 | -1.951191 | H           | -2.462407 | 4.784714  | -0.549578 |
| C | 1.362339  | -1.920338 | 1.599109  | C           | -5.270379 | 3.301673  | -2.784180 |
| H | 2.395883  | -1.566700 | 1.705236  | H           | -3.693996 | 2.292320  | -3.843274 |
| H | 1.308616  | -2.653325 | 0.791342  | C           | -5.592494 | 4.165564  | -1.736371 |
| H | 1.086689  | -2.399995 | 2.546655  | H           | -4.825555 | 5.363750  | -0.112296 |
| C | 0.432523  | -0.759212 | 1.303196  | H           | -6.054309 | 2.850911  | -3.385379 |
| C | 0.374897  | 0.318005  | 2.266162  | H           | -6.631983 | 4.400984  | -1.526165 |
| H | 0.994688  | 0.262758  | 3.154633  | C           | 0.041030  | 3.669822  | -1.422958 |
| C | -0.432486 | 1.412606  | 2.107096  | C           | 0.180791  | 5.047263  | -1.178303 |
| C | -0.495112 | 2.536307  | 3.095241  | C           | 0.896858  | 2.747332  | -0.815491 |
| H | 0.120171  | 2.333939  | 3.974849  | C           | 1.163079  | 5.491798  | -0.297105 |
| H | -0.144826 | 3.458253  | 2.615584  | H           | -0.459375 | 5.766616  | -1.680966 |



|   |           |          |           |   |           |           |           |
|---|-----------|----------|-----------|---|-----------|-----------|-----------|
| C | 1.896724  | 3.208471 | 0.044690  | H | -1.527753 | -0.302406 | -0.642253 |
| H | 0.769321  | 1.678756 | -0.958529 | C | 2.126395  | -1.558584 | 0.883364  |
| C | 2.024823  | 4.571010 | 0.311180  | H | 2.695235  | -1.633616 | 1.815579  |
| H | 1.262030  | 6.554241 | -0.093000 | H | 2.820630  | -1.429866 | 0.044407  |
| H | 2.542972  | 2.485159 | 0.530881  | H | 1.594427  | -2.503047 | 0.715138  |
| H | 2.792838  | 4.921063 | 0.995688  | C | 1.115480  | -0.413736 | 0.880901  |
| C | -0.786536 | 4.213972 | -4.063508 | C | 0.984513  | 0.343223  | 2.077846  |
| C | 0.563692  | 4.446056 | -4.375917 | H | 1.636824  | 0.060672  | 2.898057  |
| C | -1.779831 | 4.797311 | -4.861198 | C | 0.074373  | 1.386610  | 2.345755  |
| C | 0.910539  | 5.231078 | -5.473537 | C | 0.135979  | 2.031193  | 3.725762  |
| H | 1.345664  | 4.020688 | -3.754298 | H | 0.891389  | 1.583036  | 4.378298  |
| C | -1.429593 | 5.587301 | -5.959451 | H | 0.351315  | 3.100867  | 3.610331  |
| H | -2.827586 | 4.649645 | -4.625898 | H | -0.846680 | 1.951807  | 4.205980  |
| C | -0.086420 | 5.802474 | -6.270309 | O | 0.475808  | -0.226339 | -0.185827 |
| H | 1.958626  | 5.401203 | -5.702913 | O | -0.804797 | 1.876069  | 1.572291  |
| H | -2.210408 | 6.037422 | -6.566056 | H | -1.353773 | 1.644017  | 0.192466  |
| H | 0.184363  | 6.417969 | -7.123628 |   |           |           |           |
